# Supplementary material
Source: PubMed Central journal article supplement (PMC9767919)
Supplement: 41598_2022_25196_MOESM1_ESM.pdf [file 41598_2022_25196_MOESM1_ESM.pdf]

## Supplementary Information for

### Environmental DNA as an innovative technique to identify the origins of falsified antimalarial tablets - a pilot study of the pharmabiome

Jennifer M. Young<sup>1\*</sup>, Craig Liddicoat<sup>1,2</sup>, Kor-jent van Dijk<sup>3</sup>, Patricia Taberner<sup>4-7</sup>, Celine Caillet<sup>4-6</sup>, Nicholas J. White<sup>6,8</sup>, Adrian Linacre<sup>1</sup>, Jeremy J. Austin<sup>9</sup>, Paul N. Newton<sup>4,5,6,8,10,11\*</sup>

<sup>1</sup>College of Science and Engineering, Flinders University, Adelaide, South Australia 5042, Australia

<sup>2</sup>School of Public Health, The University of Adelaide, Adelaide, South Australia 5005, Australia

<sup>3</sup>Advanced DNA, Identification and Forensic Facility, School of Biological Sciences, University of Adelaide, South Australia 5005, Australia

<sup>4</sup>Lao-Oxford-Mahosot-Hospital-Wellcome Trust Research Unit (LOMWRU), Microbiology Laboratory, Mahosot Hospital, Vientiane, Lao PDR

<sup>5</sup>Centre for Tropical Medicine and Global Health, Nuffield Department of Medicine, University of Oxford, OX3 7LJ, UK

<sup>6</sup>Infectious Diseases Data Observatory, Nuffield Department of Medicine, University of Oxford, OX3 7LJ, UK

<sup>7</sup>Public Health Unit, Faculty of Medicine, University of Alcalá, 28871 Alcalá de Henares, Spain

<sup>8</sup>Mahidol Oxford Research Unit, Faculty of Tropical Medicine, Mahidol University, Bangkok, 10400, Thailand

<sup>9</sup>Australian Centre for Ancient DNA, School of Biological Sciences, University of Adelaide, Adelaide, South Australia 5005, Australia

<sup>10</sup>Faculty of Infectious and Tropical Diseases, London School of Hygiene and Tropical Medicine, London, WC1E 7HT, UK

<sup>11</sup>Boston University School of Public Health, Boston, MA 02118, USA

\* Jennifer M. Young, Paul N. Newton

**Email:** [Jennifer.young@adelaide.edu.au](mailto:Jennifer.young@adelaide.edu.au), [Paul.newton@tropmedres.ac](mailto:Paul.newton@tropmedres.ac);

**This pdf includes:**Methods  
References (SI Appendix Text)  
Figures S1- S8  
Tables S1- S10

## Methods.

### *DNA Extraction*

*Lysis Protocol A:* 945 uL of 0.5M EDTA (pH 8), 20 uL of 10% SDS and 20 uL of 20mg/ml Proteinase K was added to the homogenized powder and agitated at 56°C for 24 hours at 1000 rpm (Eppendorf Thermomixer). Samples were centrifuged at 16,000xg for 5 minutes to pellet any remaining powder. The supernatant was removed and 985 uL AL buffer (from the Qiagen DNeasy Mini kit) was added and mixed at room temperature for 10 minutes at 700 rpm (Thermomixer). Using this lysis protocol, some samples produced a white paste after addition of 100% ethanol (likely due to the presence of calcium carbonate) which required an additional centrifugation step prior to the spin column.

*Lysis Protocol B:* 900 uL of lysis buffer (from a timber DNA extraction method (1)), 45 uL of DTT (1M) and 18 uL of Proteinase K (20 mM/mL) were added to the homogenized powder and agitated on the thermomixer for 5 hours at 55°C at 600 rpm and then centrifuged at 16,000xg for 5 minutes to pellet any remaining powder. The supernatant was transferred to a 5 mL tube and 960 uL AL buffer (or equivalent volume was added) and mixed at room temperature for 10 minutes at 700 rpm (Thermomixer).

### *Bacterial and Eukaryote Diversity*

#### PCR Amplification.

All PCR amplifications were performed in a 12.5 µL reaction mix containing 0.3µM of each primer and 1.25 µL DNA extract in KAPA HiFi HotStart ReadyMix diluted to 1x (Kapa Biosystems, Inc., Wilmington, MA, USA). The PCR amplification protocol was 3 mins at 95°C, followed by 35 cycles of 95°C for 20s, 55°C 15s, and 72°C for 30 s, and a final extension at 72°C for 10 mins. PCR amplifications were performed in triplicate and pooled to minimise PCR bias, and a no-template control (NTC) was included for each PCR run to monitor background DNA levels. The pooled triplicate PCR products were quantified using a LabChip GX Touch Nucleic Acid Analyzer (PerkinElmer, Waltham, MA, United States) and were pooled into groups of approximately 20 samples before being purified using the Agencourt AMPureXP PCR Purification process (Beckman Coulter Genomics, Chaska, Minnesota, United States). The purified products were then quantified using the LabChip prior to Adapter Ligation.

#### Adapter Ligation.

*Sequencing Run 1:* Three individual tablets from three samples (G015, 15057 and 2/15044) were sequenced primarily (n=18 plus EBCs and NTC, Table S1). In this instance, PCR set up was done manually in a dedicated UV hood and Illumina TruSeq adapters were added using the Bionline JetSeq Flex Library Kit following the manufacturer's instructions. Purified PCR products were pooled into four batches (2 x16S, 2 x18S) representing ~12 DNA extracts in each. The resulting 16S PCR pools were diluted to 1 ng/uL and 18S PCR pools were diluted to 0.5 ng/uL. An adapter concentration of 4 uM was used in the ligation reaction and a unique P7 index was incorporated to differentiate the two markers during analysis: a universal P5 adapter was used. Following adapter ligation and purification using Agencourt AMPure XP at 0.8X (Beckman Coulter Genomics, NSW), all pools were quantified using an Agilent 2200 TapeStation (Agilent Technologies, Santa Clara, CA, USA) and combined at equimolar concentration. The final library was diluted to 4 nM and sequenced using a 300 cycle Illumina MiSeq kit at the Australian Genomics Research Facility (Adelaide).

*Sequencing Run 2:* For the remaining DNA extracts (n=58 plus EBCs, Table S1), PCR amplification was done on an Eppendorf Epmotion Robot, and the Illumina TruSeq Adapters were added using the NEBNext Ultra II Library Preparation Kit (New England Biolabs, Ipswich, MA, United States) following the manufacturer's instructions. Purified PCR products were pooled into six batches (3 x 16S, 3 x 18S), each representing either 20 or 24 DNA extracts, and a unique P5 and P7 index combination was incorporated for each sample (Table S1) with a working adapter concentration of 15uM. DNA input for 16S pools and 18S pools ranged from 6-10 ng/uL and 16-36 ng/uL respectively. Following adapter ligation and purification using Magna Beads (2), all

pools were quantified using an Agilent 2200 TapeStation (Agilent Technologies, Santa Clara, CA, USA) and combined at equimolar concentration. The final library was diluted to 4 nM and sequenced using a 300 cycle Illumina MiSeq kit at South Australian Health and Medical Research Institute (SAHMRI, Adelaide).

#### Data Analysis.

Raw reads were demultiplexed into the adapter ligation pools using the P5/P7 index sequences on the Illumina software. In CLC Main Workbench (QIAGEN v12), fastq files were demultiplexed into DNA extracts using the unique dual barcode combinations and primer sequences were trimmed using default settings in 'trim sequences' function. All trimmed fastq files from Run 1 and Run 2 were exported from CLC and imported into QIIME 2 v 2019.1 (3) in 'PairedEndFastqManifestPhred3' format: files for 16S rRNA and 18S rRNA were imported separately. In QIIME 2, sequences were quality filtered using *deblur* and *dada2* (both with trim length of 120 bp) for 16S and 18S, respectively. For both datasets, features with >100 sequences in the controls (EBCs or NTC) were excluded from the sample data. Linear Regression in R was used to determine statistical difference in the number of retained reads for genuine/falsified, packaging type and sample (Table S4). 16S rRNA taxonomy was assigned using the Greengenes 99% OTU sequence and taxonomy reference data (trunc-len 120, min length 100, max length 400) and a Naïve Bayes classifier, and 18S rRNA taxonomy was assigned using the *Silva\_128\_99\_classifier*. Alpha diversity (Faith Phylogenetic Distance) and Beta diversity (Bray-Curtis Distance) were determined using a rarefaction depth of 1200 and 160 for 16S and 18S, respectively.

#### ***Human Mitochondrial Control Region Analysis.***

Based on detection of *H. sapiens* in the 18S rRNA analysis, 10 falsified tablet DNA extracts were selected for mitochondrial DNA control region analysis. For 2/15058, 2/15009 and 2/15058, two DNA extracts originating from two separate tablets were analysed and for sample 2/15057, both DNA extracts from two tablets were analysed. For each sample, a short, 115 bp fragment of the mtDNA control region spanning positions 16,118–16,232 of the hypervariable region 1 was amplified using primers L16117/H16233 and PCR conditions previously described (4, 5). The hypervariable region 1 is the most polymorphic section of human mtDNA, is the primary target for human forensic mtDNA studies, and has the largest forensic population reference databases available for comparison. The selected amplicon is the shortest (of four overlapping amplicons) and most reliable (in terms of amplification and sequencing success) that has been routinely used for human hypervariable region I sequencing (e.g. 4, 5). PCRs were done in 25 uL volumes containing 1x High Fidelity Buffer (Thermo Fisher Scientific), 1 mg/mL Rabbit Serum Albumin (Sigma), 2 mM MgSO<sub>4</sub>, 250 uM each dNTP, 0.5U Platinum Taq High Fidelity (Thermo Fisher Scientific), 400 nM forward primer, 400 nM reverse primer, and 2 uL of DNA. Each primer included an M13 tag to enable sequencing of all amplicons with the same sequencing primers. Thermocycling conditions were 94°C for 2min followed by 50 cycles of 94°C for 15s, 55°C for 15s, and 68°C for 30s, followed by 10min. at 68°C. A no template control and two extraction blank controls were included. PCR products were visualized via electrophoresis on a 3.5% agarose TBE gel and those from the tablet DNA extracts were sent to Australian Genome Research Facility (AGRF, Adelaide, South Australia) for purification and bi-directional Sanger sequencing. Sequence chromatograms were visualized in GeneiousPrime v2020.2.4 (Biomatters) and aligned to the revised Cambridge Reference Sequence (rCRS) (6). Haplogroup predictions were obtained from the EMPOP mtDNA database (v4/R13)(7- 10) by submitting haplotypes with a restricted range of 16118-16,222. The frequency of the predicted haplogroups across different geographic populations was determined using the mtDNAmapp (11) and compared to the frequency across different geographic populations described by the 1000 Genomes Project (12).

## References

1. A. Lowe, et al. A method of extracting plant nucleic acids from lignified plant tissue. International Patent Number WO/2015/070279 (2015).
2. N. Rohland, D. Reich. Cost-effective, high-throughput DNA sequencing libraries for multiplexed target capture. *Genome Res.* 22 5:939-46(2012).
3. E. Bolyen, et al. Reproducible, interactive, scalable and extensible microbiome data science using QIIME 2. *Nat. Biotechnol.* 37 8:852-57(2019).
4. J.M. Young, D. Higgins, J. Austin. Hybridization enrichment to improve forensic mitochondrial DNA analysis of highly degraded human remains. *Front. Ecol. Evol.* 7:450(2019).
5. W. Haak, et al. Ancient DNA from the first European farmers in 7500-year-old Neolithic sites. *Science* 310 5750:1016-18(2005).
6. R.M. Andrews, et al. Reanalysis and revision of the Cambridge reference sequence for human mitochondrial DNA. *Nat. Genet.* 23 2:147-47(1999).
7. W. Parson, A. Dür. EMPOP—a forensic mtDNA database. *Forensic Sci. Int. Genet.* 1 2:88-92(2007).
8. W. Parson, et al. DNA Commission of the International Society for Forensic Genetics: revised and extended guidelines for mitochondrial DNA typing. *Forensic Sci. Int. Genet.* 13:134-42(2014).
9. B. Zimmermann, et al. Application of a west Eurasian-specific filter for quasi-median network analysis: sharpening the blade for mtDNA error detection. *Forensic Sci. Int. Genet.* 5 2:133-37(2011).
10. N. Huber, W. Parson, A. Dür. Next generation database search algorithm for forensic mitogenome analyses. *Forensic Sci. Int. Genet.* 37:204-14(2018).
11. H. ur Rasheed, M. Jawad, S. Nazir, S. Noreen, A. Rakha. mtDNAMap: Geographic representation of mtDNA Haplogroups. *Forensic Sci. Int. Genet. Suppl. Ser.* 6:e516-e17(2017).
12. L. Rishishwar, I.K. Jordan. Implications of human evolution and admixture for mitochondrial replacement therapy. *BMC Genomics.* 18 1:1-11(2017).

## Supplementary Figures

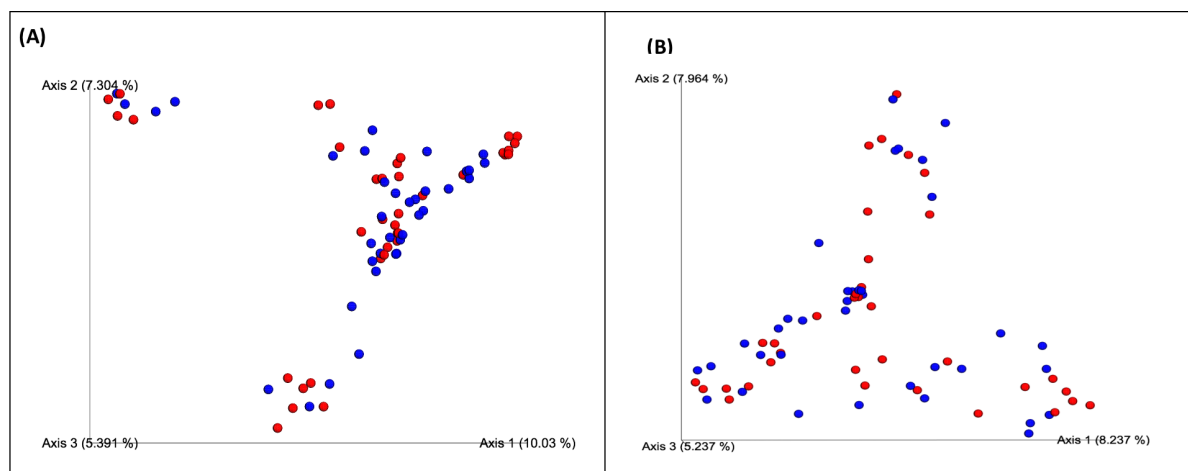

**Figure S1:** Bray-Curtis Principal Coordinate Analysis of (A) 16S rRNA (rarefied at 1200 sequences) and (B) 18S rRNA (rarefied at 100 sequences) grouped by Lysis Protocol A (Red) and Protocol B (Blue). PERMANOVA: 16S,  $p=0.105$ ,  $t$ -statistic = 1.255; 18S  $p=0.999$ ,  $t$ -stat=0.648.

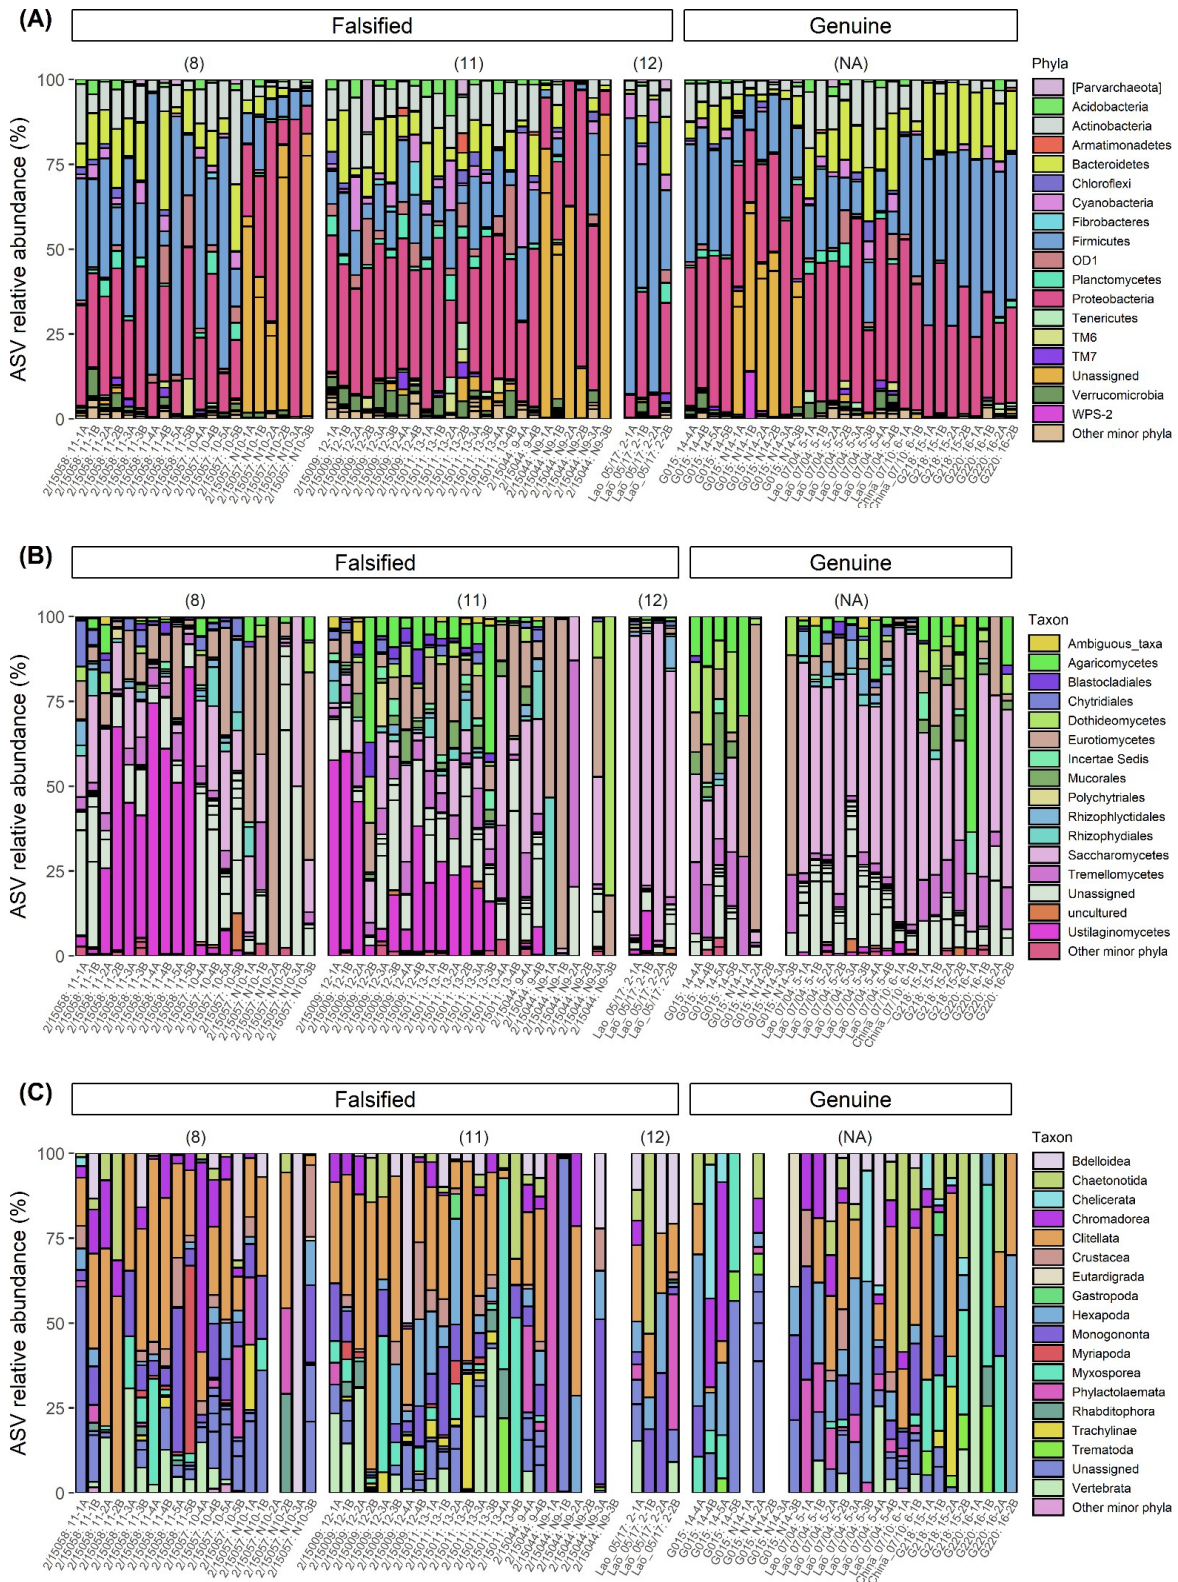

**Figure S2:** Amplicon sequence variant (ASV) relative abundance bar plots for (A) Bacteria, (B) Fungi, (C) Metazoa, grouped by falsified vs. genuine, and packaging type (in brackets). Missing columns indicate absence of the particular taxon in those samples. Common starting numbers in the sample identifiers listed along the bottom indicate common samples.

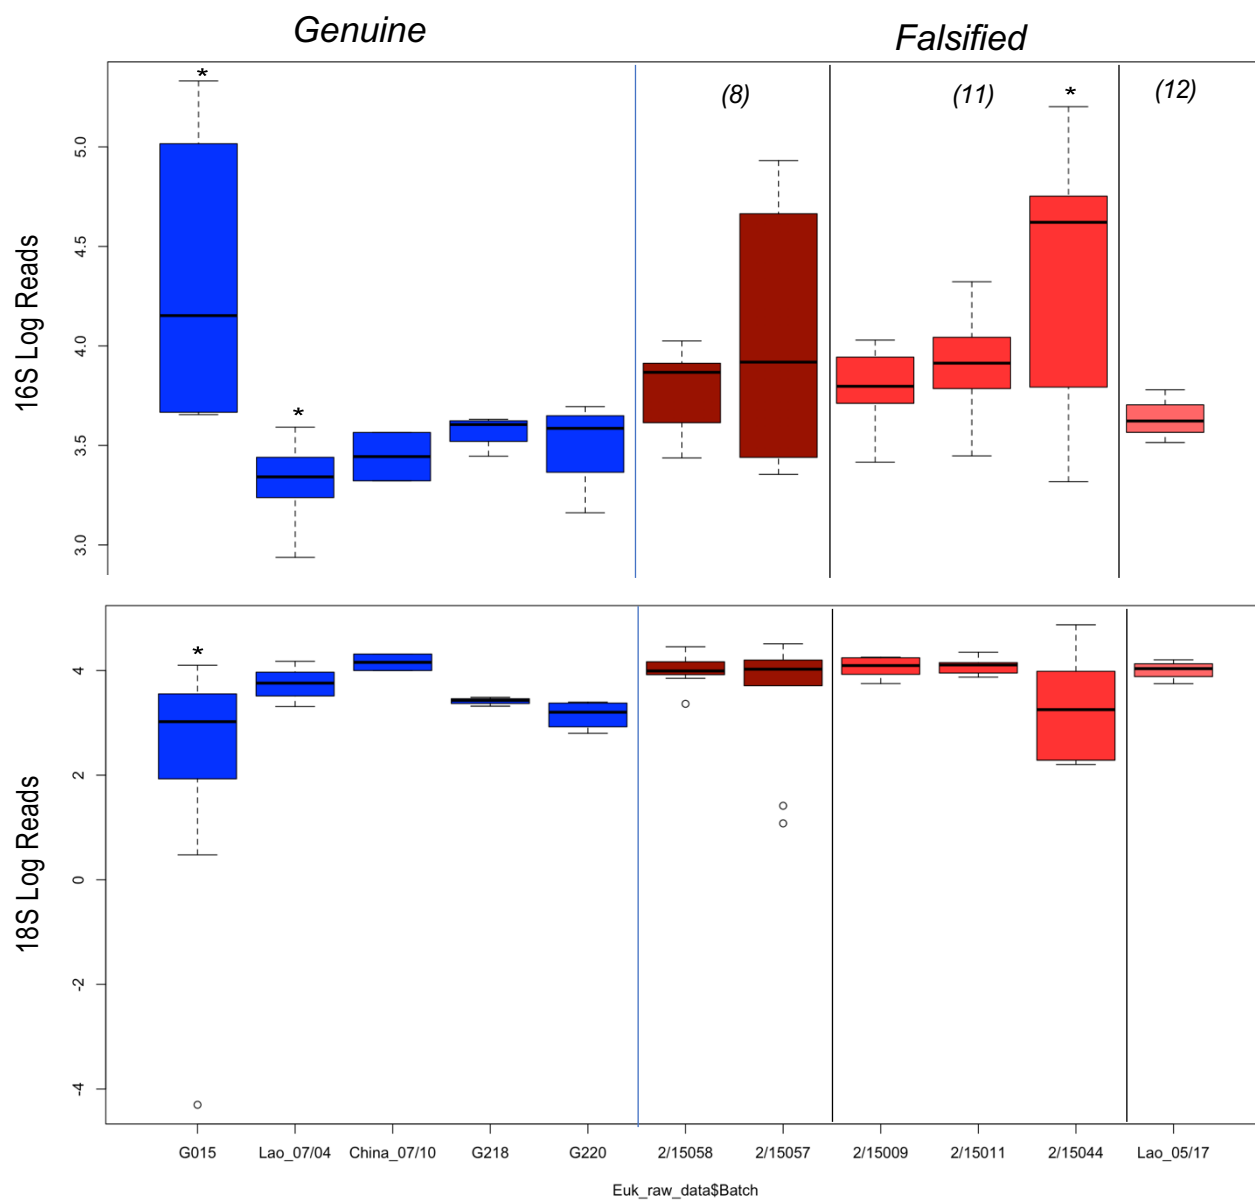

**Figure S3:** Number of reads retained in the genuine and falsified tablet samples after quality filtering and removal of sequences detected in control sample.

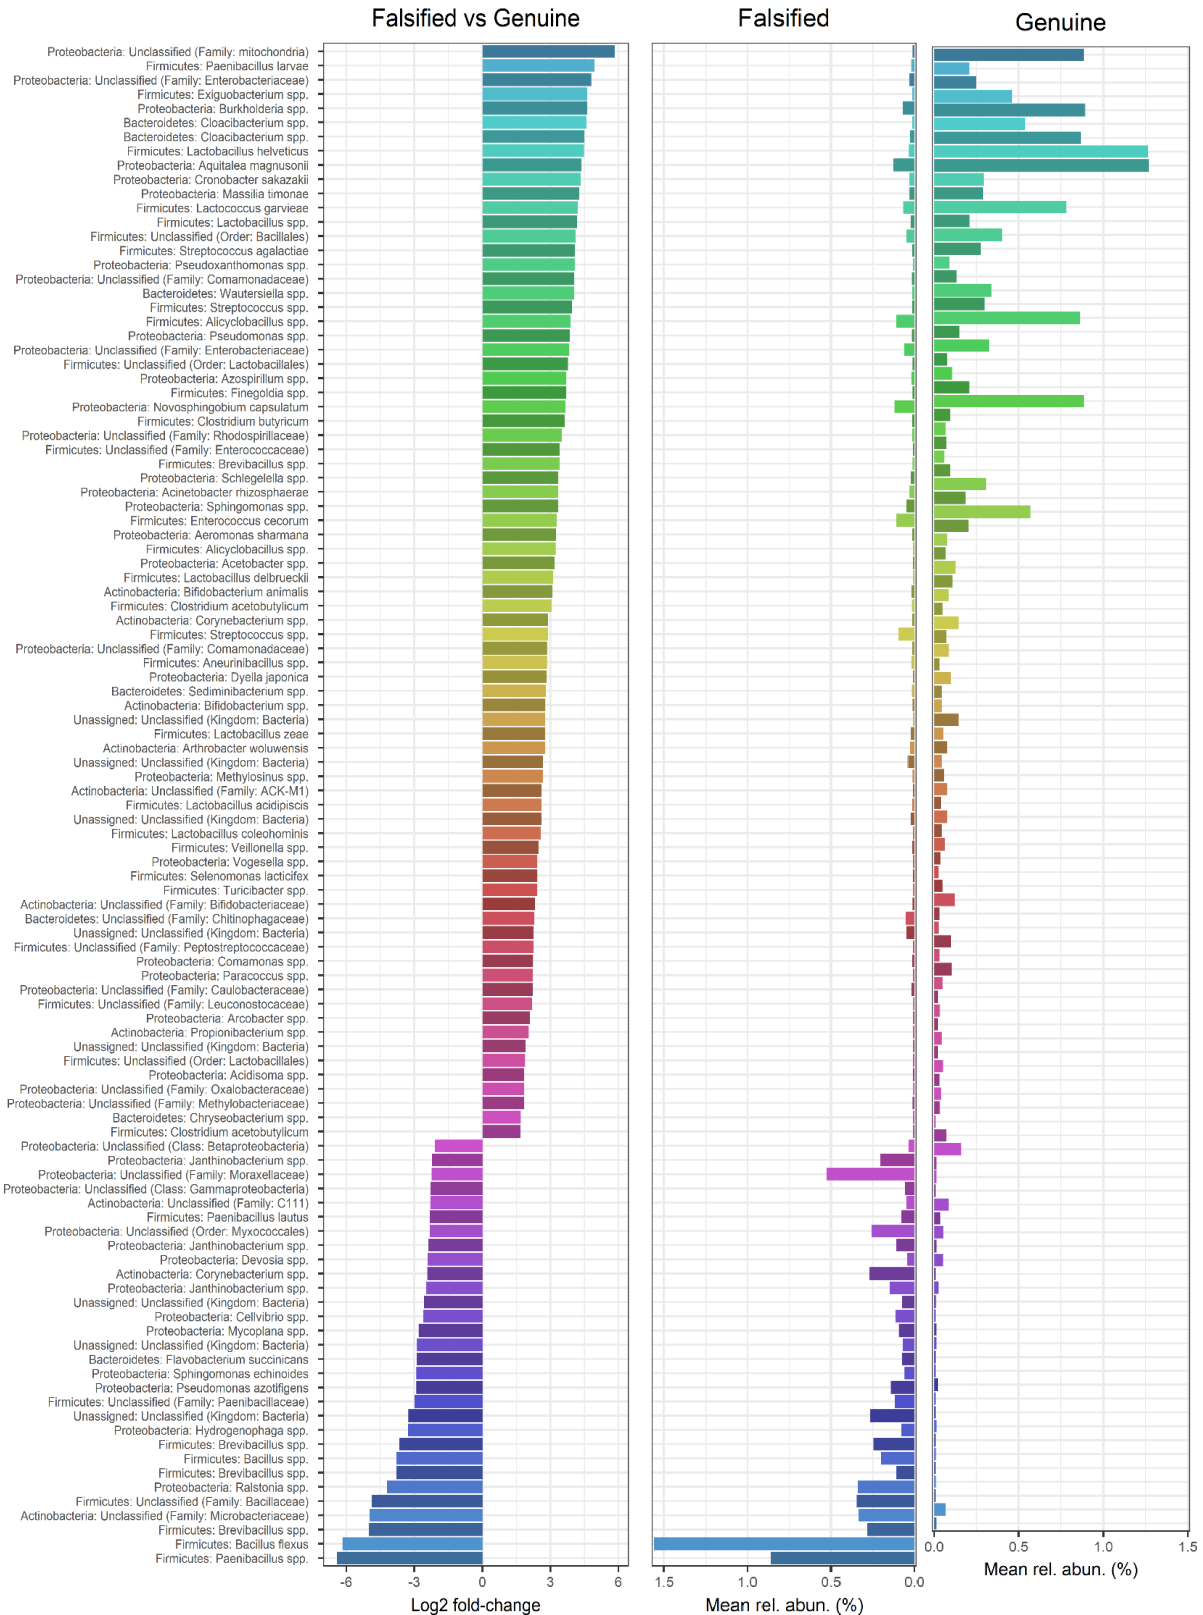

**Figure S4:** Differentially abundant bacterial ASVs between falsified (n = 48) and genuine (n = 28) tablets. The panels show the log<sub>2</sub> fold-change between falsified and genuine tablets (at a significance level of alpha = 0.0001), and also the mean relative abundance (%) of taxa within the respective groups. Taxa (n = 107) are annotated with Phylum, Genus and Species where available, or otherwise to the nearest available classification.



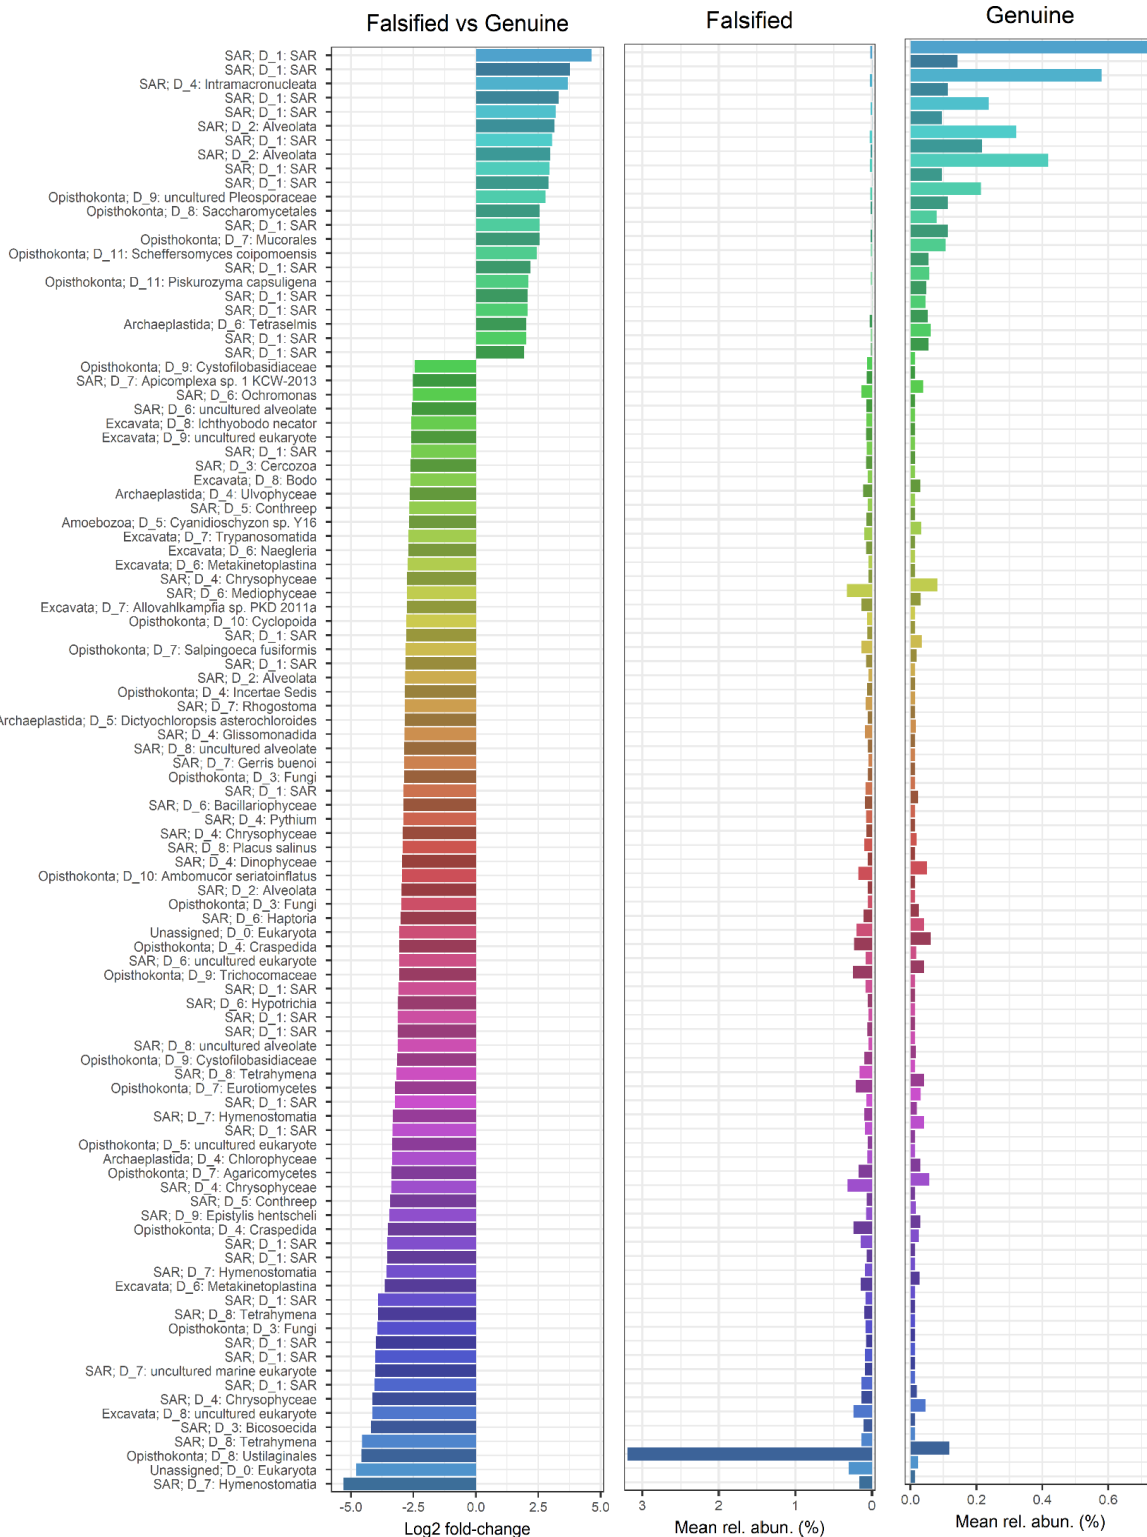

**Figure S5.** Differentially abundant eukaryote ASVs between falsified (n = 48) and genuine (n = 27) tablets. The panels show the log<sub>2</sub> fold-change between falsified and genuine tablets (at a significance level of alpha = 0.00001), and also the mean relative abundance (%) of taxa within the respective groups. Taxa (n = 102) are annotated at the D<sub>1</sub> taxonomy level and also to the finest available classification. Note the different scales for mean relative abundance.

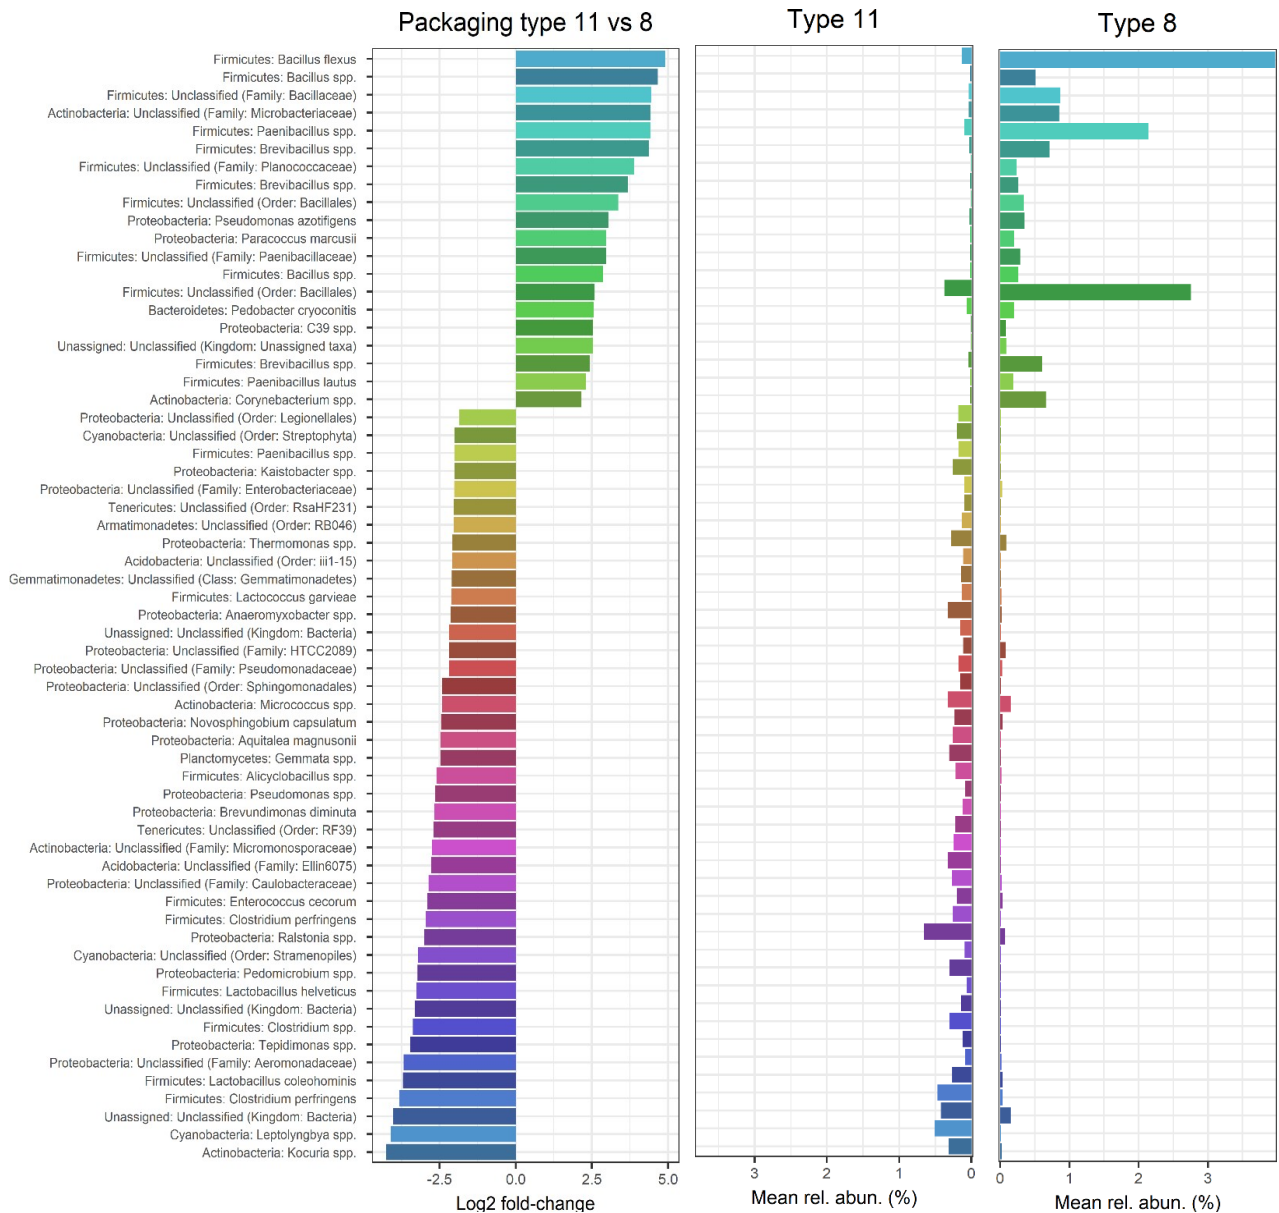

**Figure S6.** Differentially abundant bacterial ASVs in Falsified-only tablets, between packaging Type 11 ( $n = 24$ ) and packaging Type 8 ( $n = 20$ ). The panels show the log<sub>2</sub> fold-change between packaging Type 11 and packaging Type 8 tablets (at a significance level of  $\alpha = 0.001$ ), and also the mean relative abundance (%) of taxa with the respective groups. Taxa ( $n = 62$ ) are annotated with Phylum, Genus and Species where available, or otherwise to the nearest available classification.

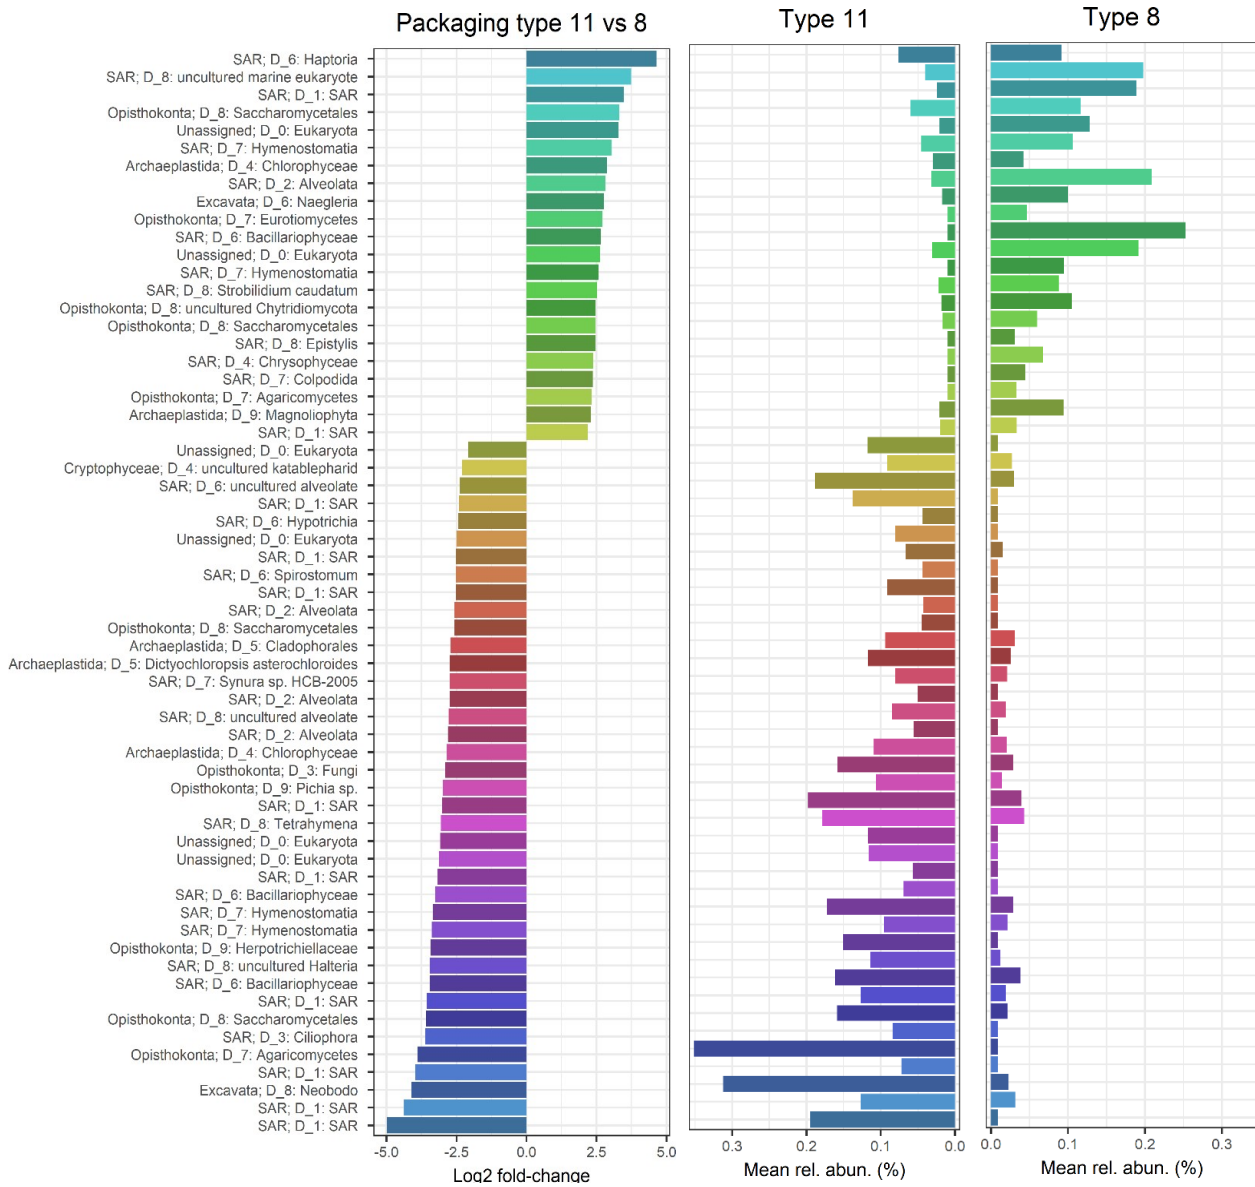

**Figure S7:** Differentially abundant eukaryote ASVs in falsified tablets, between packaging Type 11 (n = 24) and packaging Type 8 (n = 20). The panels show the log<sub>2</sub> fold-change between packaging Type 11 and packaging Type 8 tablets (at a significance level of alpha = 0.001), and also the mean relative abundance (%) of taxa with the respective groups. Taxa (n = 61) are annotated with Phylum, Genus and Species where available, or otherwise to the nearest available classification.

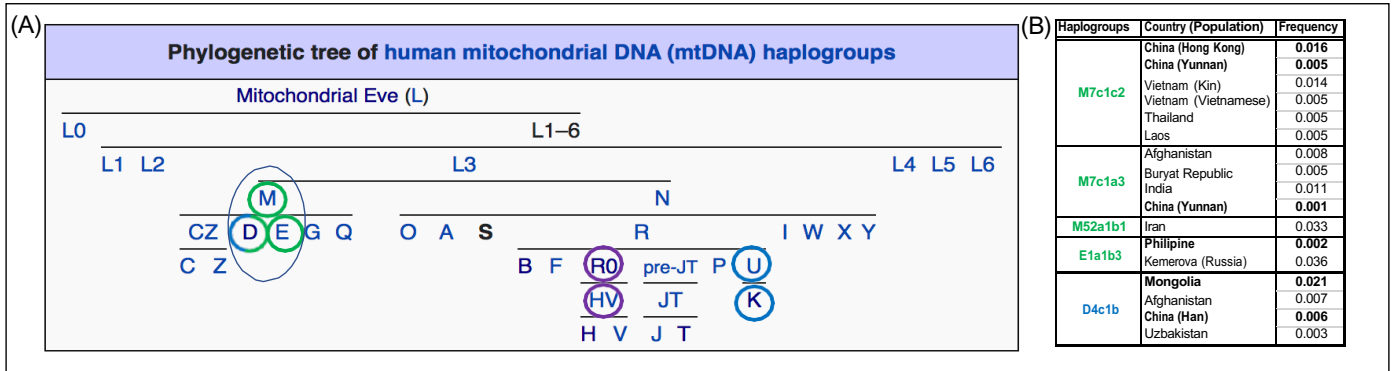

**Figure S8: The human mtDNA biogeographic ancestry predictions detected using control region sequence recovered from tablet DNA extracts.** (A) The predicted mitochondrial haplogroup of three different control region sequences detected across five DNA extracts projected onto the phylogenetic tree of mtDNA haplogroups. (B) The frequency of predicted mtDNA sub-haplogroups (represented in more than one DNA extract) across different geographic populations.

Colours indicate groups of tablet DNA extracts with identical CR sequence: Green= 2/15057-5A and 2/15009-1B, Blue = 2/15057-4A and 2/15058-4B, Purple = 2/15057-4B.

## **Supplementary Tables**

**Table S1:** Statistical analysis of Beta diversity (PERMANOVA), alpha diversity (Faith\_FD) and the number of reads retained after quality filtering (linear regression) for 16S rRNA and 18S rRNA for three comparisons. Bold values indicate statistical significance ( $p < 0.05$ ).

|                        | 16S rRNA       |                    | 18S rRNA       |                    |
|------------------------|----------------|--------------------|----------------|--------------------|
| <b>PERMANOVA</b>       | <b>p-value</b> | <b>t-statistic</b> | <b>p-value</b> | <b>t-statistic</b> |
| Genuine/Falsified      | <b>0.001</b>   | 4.213              | <b>0.001</b>   | 3.662              |
| Packaging Type         | <b>0.001</b>   | 3.389              | <b>0.001</b>   | 3.662              |
| Sample                 | <b>0.001</b>   | 2.931              | <b>0.001</b>   | 2.286              |
| <b>Faith_PD</b>        | <b>p-value</b> | <b>H-value</b>     | <b>p-value</b> | <b>H-value</b>     |
| Genuine/Falsified      | 0.047          | 3.927              | <b>0.0003</b>  | 12.870             |
| Packaging Type         | 0.250          | 4.112              | <b>0.00003</b> | 23.787             |
| Sample                 | <b>0.003</b>   | 26.363             | <b>0.0002</b>  | 34.171             |
| <b>Number of Reads</b> | <b>p-value</b> | <b>F-statistic</b> | <b>p-value</b> | <b>F-statistic</b> |
| Genuine/Falsified      | 0.1258         | 2.398              | <b>0.009</b>   | 7.121              |
| Packaging Type         | 0.3058         | 1.217              | 0.870          | 0.1397             |
| Sample                 | <b>0.00019</b> | 4.15               | <b>0.01781</b> | 2.384              |

**Table S2:** Pairwise p-values from PERMANOVA of Bray-Curtis Distance Matrix for 16S rRNA data. n=number of tablets per sample included in analysis. Tablet samples with no statistically significant differences ( $p < 0.05$ ) are in Bold.

|                        | 2/15009 | 2/15011      | 2/15044 | 2/15058      | China07/10 | G015  | G218         | G220         | Lao05/17     | Lao07/04    |
|------------------------|---------|--------------|---------|--------------|------------|-------|--------------|--------------|--------------|-------------|
| <i>2/15057 (n=5)</i>   | 0.008   | 0.001        | 0.03    | <b>0.068</b> | 0.018      | 0.001 | 0.001        | 0.002        | 0.001        | 0.001       |
| <i>2/15009 (n=4)</i>   |         | <b>0.628</b> | 0.003   | 0.003        | 0.028      | 0.001 | 0.001        | 0.005        | 0.002        | 0.002       |
| <i>2/15011 (n=4)</i>   |         |              | 0.001   | 0.001        | 0.029      | 0.001 | 0.002        | 0.003        | 0.002        | 0.002       |
| <i>2/15044 (n=4)</i>   |         |              |         | 0.001        | 0.028      | 0.002 | 0.002        | 0.002        | 0.005        | 0.004       |
| <i>2/15058 (n=5)</i>   |         |              |         |              | 0.019      | 0.001 | 0.002        | 0.001        | 0.002        | 0.002       |
| <i>China (n=1)</i>     |         |              |         |              |            | 0.014 | <b>0.078</b> | <b>0.063</b> | <b>0.059</b> | <b>0.05</b> |
| <i>G015 (n=5)</i>      |         |              |         |              |            |       | 0.002        | 0.002        | 0.001        | 0.001       |
| <i>G218 (n=2)</i>      |         |              |         |              |            |       |              | <b>0.088</b> | 0.025        | 0.004       |
| <i>G220 (n=2)</i>      |         |              |         |              |            |       |              |              | 0.029        | 0.007       |
| <i>Lao_05/17 (n=2)</i> |         |              |         |              |            |       |              |              |              | 0.005       |

**Table S3:** Pairwise p-values from PERMANOVA of Bray-Curtis Distance Matrix for 18S rRNA data. n=number of tablets per sample included in analysis. Tablet samples with no statistically significant differences ( $p < 0.05$ ) are highlighted in Bold.

|                         | 2/15009 | 2/15011      | 2/15044     | 2/15058      | China07/10   | G015         | G218         | G220         | Lao05/17     | Lao07/04 |
|-------------------------|---------|--------------|-------------|--------------|--------------|--------------|--------------|--------------|--------------|----------|
| <b>2/15057 (n=5)</b>    | 0.001   | 0.001        | <b>0.32</b> | 0.003        | <b>0.058</b> | 0.005        | 0.006        | 0.002        | 0.003        | 0.001    |
| <b>2/15009 (n=4)</b>    |         | <b>0.956</b> | 0.001       | <b>0.412</b> | 0.017        | 0.001        | 0.001        | 0.002        | 0.004        | 0.001    |
| <b>2/15011 (n=4)</b>    |         |              | 0.001       | 0.003        | 0.028        | 0.001        | 0.001        | 0.002        | 0.004        | 0.001    |
| <b>2/15044 (n=4)</b>    |         |              |             | 0.001        | 0.039        | <b>0.076</b> | 0.004        | 0.002        | 0.001        | 0.001    |
| <b>2/15058 (n=5)</b>    |         |              |             |              | 0.017        | 0.001        | 0.003        | 0.003        | 0.001        | 0.001    |
| <b>China07/10 (n=1)</b> |         |              |             |              |              | 0.034        | <b>0.062</b> | <b>0.077</b> | <b>0.056</b> | 0.023    |
| <b>G015 (n=5)</b>       |         |              |             |              |              |              | 0.013        | 0.007        | 0.003        | 0.001    |
| <b>G218 (n=2)</b>       |         |              |             |              |              |              |              | <b>0.253</b> | 0.029        | 0.002    |
| <b>G220 (n=2)</b>       |         |              |             |              |              |              |              |              | 0.022        | 0.003    |
| <b>Lao05/17 (n=2)</b>   |         |              |             |              |              |              |              |              |              | 0.006    |

**Table S4:** Wilcoxon rank sum test/Mann-Whitney significance test of Bray-Curtis similarity ‘Within’ and ‘Between’ samples for 16S and 18S using genuine tablets only, falsified tablets only and all tablets combined.

|            |                  | Number of samples |                | Median Bray-Curtis Similarity |                | Within Vs Between         | Within Genuine vs within |
|------------|------------------|-------------------|----------------|-------------------------------|----------------|---------------------------|--------------------------|
|            |                  | <b>Within</b>     | <b>Between</b> | <b>Within</b>                 | <b>Between</b> | <i>p-value (W)</i>        | <i>p-value (W)</i>       |
| <b>16S</b> | <b>Genuine</b>   | 79                | 272            | 0.227                         | 0.055          | <i>2.2e-16 (19074)</i>    | NA                       |
|            | <b>Falsified</b> | 171               | 910            | 0.078                         | 0.038          | <i>4.519e-16 (107918)</i> | <i>2.2e-16 (11098)</i>   |
|            | <b>All</b>       | 250               | 2451           | 0.109                         | 0.039          | <i>2.2e-16 (472951)</i>   | <i>1.886e-09 (14219)</i> |
| <b>18S</b> | <b>Genuine</b>   | 62                | 238            | 0.219                         | 0.063          | <i>1.229e-10 (11227)</i>  | NA                       |
|            | <b>Falsified</b> | 163               | 872            | 0.088                         | 0.038          | <i>9.813e-11 (93299)</i>  | <i>9.294e08 (7326.5)</i> |
|            | <b>All</b>       | 225               | 2260           | 0.112                         | 0.038          | <i>2.2e-16 (356588)</i>   | <i>4.242e-5 (9248.5)</i> |



**Table S5:** Eukaryote species identified as indicator taxa (differentially abundant) for genuine and falsified tablets. Positive log2FoldChange (G/F) values indicate ‘genuine’ indicator taxa and negative log2FoldChange (G/F) values indicate ‘falsified’ indicator taxa.

| Indicator species                        | log2FoldChange | mean_rel_abu<br>Falsified | mean_rel_abun<br>Genuine |
|------------------------------------------|----------------|---------------------------|--------------------------|
| <b>Genuine</b>                           |                |                           |                          |
| <i>Piskurozyma capsuligena</i>           | 2.108          | 0.009                     | 0.056                    |
| <i>Scheffersomyces coipomoensis</i>      | 2.439          | 0.011                     | 0.106                    |
| <b>Falsified</b>                         |                |                           |                          |
| <i>Epistylis hentscheli</i>              | -3.457         | 0.076                     | 0.017                    |
| <i>Ambomucor seriatoinflatus</i>         | -2.965         | 0.184                     | 0.049                    |
| <i>Placus salinus</i>                    | -2.922         | 0.100                     | 0.018                    |
| <i>Gerris buenoi</i>                     | -2.867         | 0.043                     | 0.013                    |
| <i>Dictyochloropsis asterochloroides</i> | -2.848         | 0.051                     | 0.013                    |
| <i>Salpingoeca fusiformis</i>            | -2.808         | 0.139                     | 0.034                    |
| <i>Allovahlkampfia</i> sp. PKD 2011a     | -2.766         | 0.142                     | 0.031                    |
| <i>Cyanidioschyzon</i> sp. Y16           | -2.678         | 0.074                     | 0.013                    |
| <i>Ichthyobodo necator</i>               | -2.577         | 0.073                     | 0.013                    |
| <i>Apicomplexa</i> sp. 1 KCW-2013        | -2.516         | 0.069                     | 0.013                    |

**Table S6:** Eukaryote ASVs identified as indicator taxa (differentially abundant) for packaging Type 8 or 11. Positive log2FoldChange values indicate ‘Falsified Type 8’ indicator taxa and negative log2FoldChange values indicate ‘Falsified Type 11’ indicator taxa. Letters in italics indicate the lowest taxonomic level an ASV could be identified: Phylum (*p*), Class (*c*), subclass (*sc*), Order (*o*), Family (*f*), and Genus (*g*). ASVs identified to species level are highlighted in bold.

| Taxa                            | Packaging Type | Indicator Taxa                                  | log2FoldChange |
|---------------------------------|----------------|-------------------------------------------------|----------------|
| Fungi                           | 8              | Saccharomycetales <sup><i>o</i></sup>           | 3.311029692    |
|                                 |                | Eurotiomycetes <sup><i>c</i></sup>              | 2.716040366    |
|                                 |                | uncultured Chytridiomycota <sup><i>p</i></sup>  | 2.463027639    |
|                                 |                | Saccharomycetales <sup><i>o</i></sup>           | 2.458922543    |
|                                 |                | Agaricomycetes <sup><i>c</i></sup>              | 2.329453251    |
|                                 | 11             | Agaricomycetes <sup><i>c</i></sup>              | -3.883331435   |
|                                 |                | Saccharomycetales <sup><i>o</i></sup>           | -3.583393581   |
|                                 |                | Herpotrichiellaceae <sup><i>f</i></sup>         | -3.426031565   |
|                                 |                | <b><i>Pichia sp.</i></b>                        | -2.992190399   |
|                                 |                | Saccharomycetales <sup><i>o</i></sup>           | -2.57834746    |
| Algae                           | 8              | Chrysophyceae <sup><i>c</i></sup>               | 2.38583785     |
|                                 |                | Chlorophyceae <sup><i>c</i></sup>               | 2.87853893     |
|                                 | 11             | Chlorophyceae <sup><i>c</i></sup>               | -2.857943112   |
|                                 |                | <b><i>Dictyochloropsis asterochloroides</i></b> | -2.735711662   |
|                                 |                | Cladophorales <sup><i>o</i></sup>               | -2.717944156   |
| Ciliophora                      | 8              | Haptoria <sup><i>sc</i></sup>                   | 4.639548101    |
|                                 |                | Hymenostomatia <sup><i>o</i></sup>              | 3.049315105    |
|                                 |                | Hymenostomatia <sup><i>o</i></sup>              | 2.572686307    |
|                                 |                | <b><i>Strobilidium caudatum</i></b>             | 2.514828777    |
|                                 |                | Epistylis <sup><i>g</i></sup>                   | 2.452762119    |
|                                 |                | Colpodida <sup><i>o</i></sup>                   | 2.370996752    |
|                                 | 11             | uncultured Halteria <sup><i>g</i></sup>         | -3.454260373   |
|                                 |                | Hymenostomatia <sup><i>o</i></sup>              | -3.382368      |
|                                 |                | Hymenostomatia <sup><i>o</i></sup>              | -3.347008616   |
|                                 |                | Tetrahymena <sup><i>g</i></sup>                 | -3.056295144   |
|                                 |                | <b><i>Synura sp. HCB-2005</i></b>               | -2.738455866   |
| Spirostomum <sup><i>g</i></sup> | -2.514256851   |                                                 |                |

|                |           |                                                                                                                   |                              |
|----------------|-----------|-------------------------------------------------------------------------------------------------------------------|------------------------------|
|                |           | Hypotruchia <sup>s</sup>                                                                                          | -2.432196867                 |
| <b>Diatoms</b> | <b>8</b>  | Bacillariophyceae <sup>p</sup>                                                                                    | 2.648950934                  |
|                | <b>11</b> | Bacillariophyceae <sup>p</sup>                                                                                    | -3.458797784                 |
| <b>Other</b>   | <b>8</b>  | Naegleria ( <i>genus of amoebae protist</i> )                                                                     | 2.769694432                  |
|                |           | Magnoliophyta ( <i>Clade of seed plant</i> )                                                                      | 2.291942869                  |
|                | <b>11</b> | Neobodo ( <i>genus of protists</i> )<br>uncultured katablepharid<br>( <i>Order of heterotrophic flagellates</i> ) | -4.112716466<br>-2.295241965 |

**Table S7:** Details the lysis protocol, MiSeq run, forward and reverse barcode combinations and P5/P7 index used for all DNA extracts analysed by 16S and 18S rRNA.

| Tablet Batch ID | Tablet ID | DNA Extract ID | DNA Extraction Protocol/ Batch | MiSeq Run | 16S Bacteria    |                 |                       |          |                   |          | 18S Eukaryotes    |                 |                 |                       |          |                   |          |                   |
|-----------------|-----------|----------------|--------------------------------|-----------|-----------------|-----------------|-----------------------|----------|-------------------|----------|-------------------|-----------------|-----------------|-----------------------|----------|-------------------|----------|-------------------|
|                 |           |                |                                |           | Forward Barcode | Reverse Barcode | Adaptor Ligation Pool | P7 Index | P7 Index Sequence | P5 Index | P5 Index Sequence | Forward Barcode | Reverse Barcode | Adaptor Ligation Pool | P7 Index | P7 Index Sequence | P5 Index | P5 Index Sequence |
| 2/15044         | 9.1       | N9-1A          | A1                             | R1        | ACAGCTG         | TGTAAGTG        | 2                     | P1       | AACAACCG          | NA       | NA                | AGAGAC          | TAGCAGC         | 2                     | P3       | TTCTCTCT          | NA       | NA                |
| 2/15044         | 9.1       | N9-1B          | B1                             | R1        | ACAGCTG         | TGTAAGTG        | 2                     | P1       | AACAACCG          | NA       | NA                | TAGCAGC         | TACTACTG        | 2                     | P3       | TTCTCTCT          | NA       | NA                |
| 2/15044         | 9.2       | N9-2A          | A1                             | R1        | ACAGCTG         | ACAGCTGG        | 1                     | P1       | AACAACCG          | NA       | NA                | TGAGCAG         | AAGCAG          | 1                     | P3       | TTCTCTCT          | NA       | NA                |
| 2/15044         | 9.2       | N9-2B          | B1                             | R1        | ACAGCTG         | ATGCTCTG        | 1                     | P1       | AACAACCG          | NA       | NA                | TAGCAGC         | AGAGAC          | 1                     | P3       | TTCTCTCT          | NA       | NA                |
| 2/15044         | 9.3       | N9-3A          | A1                             | R1        | ACAGCTG         | TAGCTCTG        | 2                     | P1       | AACAACCG          | NA       | NA                | TCTACTG         | TAGCAGC         | 1                     | P3       | TTCTCTCT          | NA       | NA                |
| 2/15044         | 9.3       | N9-3B          | B1                             | R1        | ATCGTCT         | TCTCTGTG        | 1                     | P1       | AACAACCG          | NA       | NA                | AAGCAG          | TAGCAGC         | 2                     | P3       | TTCTCTCT          | NA       | NA                |
| 15057           | 10.1      | N10-1A         | A1                             | R1        | TGTACGT         | TGTAAGTG        | 2                     | P1       | AACAACCG          | NA       | NA                | AGAGAC          | TAGCAGC         | 2                     | P3       | TTCTCTCT          | NA       | NA                |
| 15057           | 10.1      | N10-1B         | B1                             | R1        | TGTACGT         | TGAGCTGG        | 2                     | P1       | AACAACCG          | NA       | NA                | TAGCAGC         | TGAGAG          | 2                     | P3       | TTCTCTCT          | NA       | NA                |
| 15057           | 10.2      | N10-2A         | A1                             | R1        | TGTACGT         | ACAGCTGG        | 1                     | P1       | AACAACCG          | NA       | NA                | TGAGCAG         | TAGCAGC         | 2                     | P3       | TTCTCTCT          | NA       | NA                |
| 15057           | 10.2      | N10-2B         | B1                             | R1        | TGTACGT         | ATGCTCTG        | 1                     | P1       | AACAACCG          | NA       | NA                | TAGCAGC         | TACTACTG        | 1                     | P3       | TTCTCTCT          | NA       | NA                |
| 15057           | 10.3      | N10-3A         | A1                             | R1        | TGTACGT         | TAGCTCTG        | 1                     | P1       | AACAACCG          | NA       | NA                | TCTACTG         | AAGCAG          | 1                     | P3       | TTCTCTCT          | NA       | NA                |
| 15057           | 10.3      | N10-3B         | B1                             | R1        | TGAGCTG         | TCTCTGTG        | 1                     | P1       | AACAACCG          | NA       | NA                | AAGCAG          | TAGCAGC         | 2                     | P3       | TTCTCTCT          | NA       | NA                |
| G015            | 14.1      | N14-1A         | A1                             | R1        | TGAGCTG         | TGTAAGTG        | 2                     | P1       | AACAACCG          | NA       | NA                | AGAGAC          | TGAGAG          | 2                     | P3       | TTCTCTCT          | NA       | NA                |
| G015            | 14.1      | N14-1B         | B1                             | R1        | TGAGCTG         | TGAGCTGG        | 2                     | P1       | AACAACCG          | NA       | NA                | TAGCAGC         | TAGCAGC         | 2                     | P3       | TTCTCTCT          | NA       | NA                |
| G015            | 14.2      | N14-2A         | A1                             | R1        | TGAGCTG         | ACAGCTGG        | 2                     | P1       | AACAACCG          | NA       | NA                | TGAGCAG         | TCTACTG         | 1                     | P3       | TTCTCTCT          | NA       | NA                |
| G015            | 14.2      | N14-2B         | B1                             | R1        | TGAGCTG         | A1GCTCTG        | 2                     | P1       | AACAACCG          | NA       | NA                | TAGCAGC         | AAGCAG          | 1                     | P3       | TTCTCTCT          | NA       | NA                |
| G015            | 14.3      | N14-3A         | A1                             | R1        | TGAGCTG         | TAGCTCTG        | 2                     | P1       | AACAACCG          | NA       | NA                | TCTACTG         | AGAGAC          | 1                     | P3       | TTCTCTCT          | NA       | NA                |
| G015            | 14.3      | N14-3B         | B1                             | R1        | ACAGCTG         | TCTCTGTG        | 2                     | P1       | AACAACCG          | NA       | NA                | TAGCAGC         | TGAGAG          | 1                     | P3       | TTCTCTCT          | NA       | NA                |
| EB1             | NA        | EB1-A1         | A1                             | R1        | ATCGTCT         | TGTAAGTG        | 2                     | P1       | AACAACCG          | NA       | NA                | AGAGAC          | TCTACTG         | 2                     | P3       | TTCTCTCT          | NA       | NA                |
| EB1             | NA        | EB1-A2         | A1                             | R1        | ATCGTCT         | ACAGCTGG        | 1                     | P1       | AACAACCG          | NA       | NA                | TAGCAGC         | AAGCAG          | 2                     | P3       | TTCTCTCT          | NA       | NA                |
| EB1             | NA        | EB1-B1         | B1                             | R1        | ATCGTCT         | TGAGCTGG        | 1                     | P1       | AACAACCG          | NA       | NA                | TGAGCAG         | AGAGAC          | 2                     | P3       | TTCTCTCT          | NA       | NA                |
| EB1             | NA        | EB1-B2         | B1                             | R1        | ATCGTCT         | ATGCTCTG        | 1                     | P1       | AACAACCG          | NA       | NA                | TAGCAGC         | TAGCAGC         | 1                     | P3       | TTCTCTCT          | NA       | NA                |
| NTC             | NA        | NTC            | NA                             | R1        | TCTCTGT         | TCTCTGTG        | 1                     | P1       | AACAACCG          | NA       | NA                | AAGCAG          | AAGCAG          | 1                     | P3       | TTCTCTCT          | NA       | NA                |
| Lao_05/17       | 2.1       | 2-1A           | A2                             | R2        | ACTCACTG        | TCTCTGTG        | 1                     | P1       | AACAACCG          | P1       | AACAACCG          | AAGCAG          | AAGCAG          | 1                     | P1       | AACAACCG          | P4       | GCTACAC           |
| Lao_05/17       | 2.1       | 2-1B           | B2                             | R2        | ACTCACTG        | TGTAAGTG        | 1                     | P1       | AACAACCG          | P1       | AACAACCG          | AGAGAC          | AAGCAG          | 1                     | P1       | AACAACCG          | P4       | GCTACAC           |
| Lao_05/17       | 2.2       | 2-2A           | A3                             | R2        | ACTCACTG        | TGAGCTGG        | 1                     | P1       | AACAACCG          | P1       | AACAACCG          | TAGCAGC         | AAGCAG          | 1                     | P1       | AACAACCG          | P4       | GCTACAC           |
| Lao_05/17       | 2.2       | 2-2B           | B3                             | R2        | ACTCACTG        | ACAGCTGG        | 1                     | P1       | AACAACCG          | P1       | AACAACCG          | TGAGCAG         | AAGCAG          | 1                     | P1       | AACAACCG          | P4       | GCTACAC           |
| Lao_07/04       | 5.1       | 5-1A           | A2                             | R2        | ACTCACTG        | ATGCTCTG        | 1                     | P1       | AACAACCG          | P1       | AACAACCG          | TAGCAGC         | AAGCAG          | 1                     | P1       | AACAACCG          | P4       | GCTACAC           |
| Lao_07/04       | 5.1       | 5-1B           | B2                             | R2        | ACTCACTG        | TAGCTCTG        | 1                     | P1       | AACAACCG          | P1       | AACAACCG          | TCTACTG         | AAGCAG          | 1                     | P1       | AACAACCG          | P4       | GCTACAC           |
| Lao_07/04       | 5.2       | 5-2A           | A3                             | R2        | ACTCACTG        | AGCAGCTG        | 1                     | P1       | AACAACCG          | P1       | AACAACCG          | ATGACTG         | AAGCAG          | 1                     | P1       | AACAACCG          | P4       | GCTACAC           |
| Lao_07/04       | 5.2       | 5-2B           | B3                             | R2        | ACTCACTG        | TACTATGG        | 1                     | P1       | AACAACCG          | P1       | AACAACCG          | ACACAGC         | AAGCAG          | 1                     | P1       | AACAACCG          | P4       | GCTACAC           |
| Lao_07/04       | 5.3       | 5-3A           | A2                             | R2        | ACTCACTG        | AGTATCTG        | 1                     | P1       | AACAACCG          | P1       | AACAACCG          | AGAGTAG         | AAGCAG          | 1                     | P1       | AACAACCG          | P4       | GCTACAC           |
| Lao_07/04       | 5.3       | 5-3B           | B2                             | R2        | ACTCACTG        | TGAGCTGG        | 1                     | P1       | AACAACCG          | P1       | AACAACCG          | ATCTATG         | AAGCAG          | 1                     | P1       | AACAACCG          | P4       | GCTACAC           |
| Lao_07/04       | 5.4       | 5-4A           | A3                             | R2        | ACTCACTG        | AACCGAGT        | 1                     | P1       | AACAACCG          | P1       | AACAACCG          | ACAGTAG         | AAGCAG          | 1                     | P1       | AACAACCG          | P4       | GCTACAC           |
| Lao_07/04       | 5.4       | 5-4B           | B3                             | R2        | ACTCACTG        | TAGAGAGT        | 1                     | P1       | AACAACCG          | P1       | AACAACCG          | AGCAGC          | AGAGAC          | 1                     | P1       | AACAACCG          | P4       | GCTACAC           |
| China_07/10     | 6.1       | 6-1A           | A3                             | R2        | ACTCACTG        | TCTGATGG        | 1                     | P1       | AACAACCG          | P1       | AACAACCG          | AGAGAC          | AGAGAC          | 1                     | P1       | AACAACCG          | P4       | GCTACAC           |
| China_07/10     | 6.1       | 6-1B           | B3                             | R2        | ACTCACTG        | ATGCATGG        | 1                     | P1       | AACAACCG          | P1       | AACAACCG          | TAGCAGC         | AGAGAC          | 1                     | P1       | AACAACCG          | P4       | GCTACAC           |
| 2/15044         | 9.4       | 9-4A           | A2                             | R2        | ACTCACTG        | TCATACTG        | 1                     | P1       | AACAACCG          | P1       | AACAACCG          | TGAGCAG         | AGAGAC          | 1                     | P1       | AACAACCG          | P4       | GCTACAC           |
| 2/15044         | 9.4       | 9-4B           | B2                             | R2        | ACTCACTG        | TAGCAGTG        | 1                     | P1       | AACAACCG          | P1       | AACAACCG          | TAGCAGC         | AGAGAC          | 1                     | P1       | AACAACCG          | P4       | GCTACAC           |
| 15057           | 10.4      | 10-4A          | A2                             | R2        | AGAGTAGT        | TCTCTGTG        | 1                     | P1       | AACAACCG          | P1       | AACAACCG          | TCTACTG         | AGAGAC          | 1                     | P1       | AACAACCG          | P4       | GCTACAC           |
| 15057           | 10.4      | 10-4B          | B2                             | R2        | AGAGTAGT        | TGTAAGTG        | 1                     | P1       | AACAACCG          | P1       | AACAACCG          | ATGACTG         | AGAGAC          | 1                     | P1       | AACAACCG          | P4       | GCTACAC           |
| 15057           | 10.5      | 10-5A          | A3                             | R2        | AGAGTAGT        | TGAGCTGG        | 1                     | P1       | AACAACCG          | P1       | AACAACCG          | ACACAGC         | AGAGAC          | 1                     | P1       | AACAACCG          | P4       | GCTACAC           |
| 15057           | 10.5      | 10-5B          | B3                             | R2        | AGAGTAGT        | ACAGCTGG        | 1                     | P1       | AACAACCG          | P1       | AACAACCG          | AGAGTAG         | AGAGAC          | 1                     | P1       | AACAACCG          | P4       | GCTACAC           |
| 2/15058         | 11.1      | 11-1A          | A2                             | R2        | AGAGTAGT        | ATGCTCTG        | 2                     | P2       | CAGTCTA           | P2       | CAGTCTA           | ATCTATG         | AGAGAC          | 2                     | P2       | CAGTCTA           | P5       | CGACACTT          |
| 2/15058         | 11.1      | 11-1B          | B2                             | R2        | AGAGTAGT        | TAGCTCTG        | 2                     | P2       | CAGTCTA           | P2       | CAGTCTA           | ACAGTAG         | AGAGAC          | 1                     | P1       | AACAACCG          | P4       | GCTACAC           |
| 2/15058         | 11.2      | 11-2A          | A2                             | R2        | AGAGTAGT        | AGCAGCTG        | 2                     | P2       | CAGTCTA           | P2       | CAGTCTA           | AAGCAG          | TAGCAGC         | 1                     | P1       | AACAACCG          | P4       | GCTACAC           |
| 2/15058         | 11.2      | 11-2B          | B2                             | R2        | AGAGTAGT        | TACTATGG        | 2                     | P2       | CAGTCTA           | P2       | CAGTCTA           | AGAGAC          | TAGCAGC         | 1                     | P1       | AACAACCG          | P4       | GCTACAC           |
| 2/15058         | 11.3      | 11-3A          | A2                             | R2        | AGAGTAGT        | AGTATCTG        | 2                     | P2       | CAGTCTA           | P2       | CAGTCTA           | TAGCAGC         | TAGCAGC         | 2                     | P2       | CAGTCTA           | P5       | CGACACTT          |
| 2/15058         | 11.3      | 11-3B          | B2                             | R2        | AGAGTAGT        | TGAGCTGG        | 2                     | P2       | CAGTCTA           | P2       | CAGTCTA           | TGAGAG          | TAGCAGC         | 2                     | P2       | CAGTCTA           | P5       | CGACACTT          |
| 2/15058         | 11.4      | 11-4A          | A3                             | R2        | AGAGTAGT        | AACCGAGT        | 2                     | P2       | CAGTCTA           | P2       | CAGTCTA           | TAGCAGC         | TAGCAGC         | 2                     | P2       | CAGTCTA           | P5       | CGACACTT          |
| 2/15058         | 11.4      | 11-4B          | B3                             | R2        | AGAGTAGT        | TAGAGAGT        | 2                     | P2       | CAGTCTA           | P2       | CAGTCTA           | TCTACTG         | TAGCAGC         | 2                     | P2       | CAGTCTA           | P5       | CGACACTT          |
| 2/15058         | 11.5      | 11-5A          | A3                             | R2        | AGAGTAGT        | TCTGATGG        | 2                     | P2       | CAGTCTA           | P2       | CAGTCTA           | ATGACTG         | TAGCAGC         | 2                     | P2       | CAGTCTA           | P5       | CGACACTT          |
| 2/15058         | 11.5      | 11-5B          | B3                             | R2        | AGAGTAGT        | ATGCATGG        | 2                     | P2       | CAGTCTA           | P2       | CAGTCTA           | ACACAGC         | TAGCAGC         | 2                     | P2       | CAGTCTA           | P5       | CGACACTT          |
| 2/15009         | 12.1      | 12-1A          | A2                             | R2        | AGAGTAGT        | TCTACTG         | 2                     | P2       | CAGTCTA           | P2       | CAGTCTA           | AGAGTAG         | TAGCAGC         | 2                     | P2       | CAGTCTA           | P5       | CGACACTT          |
| 2/15009         | 12.1      | 12-1B          | B2                             | R2        | AGAGTAGT        | TAGCAGTG        | 2                     | P2       | CAGTCTA           | P2       | CAGTCTA           | ATCTATG         | TAGCAGC         | 2                     | P2       | CAGTCTA           | P5       | CGACACTT          |
| 2/15009         | 12.2      | 12-2A          | A3                             | R2        | TGCTCTGG        | TCTCTGTG        | 2                     | P2       | CAGTCTA           | P2       | CAGTCTA           | ACAGTAG         | TAGCAGC         | 2                     | P2       | CAGTCTA           | P5       | CGACACTT          |
| 2/15009         | 12.2      | 12-2B          | B3                             | R2        | TGCTCTGG        | TGTAAGTG        | 2                     | P2       | CAGTCTA           | P2       | CAGTCTA           | AAGCAG          | TGAGAG          | 2                     | P2       | CAGTCTA           | P5       | CGACACTT          |
| 2/15009         | 12.3      | 12-3A          | A2                             | R2        | TGCTCTGG        | TGAGCTGG        | 2                     | P2       | CAGTCTA           | P2       | CAGTCTA           | AGAGAC          | TGAGAG          | 2                     | P2       | CAGTCTA           | P5       | CGACACTT          |
| 2/15009         | 12.3      | 12-3B          | B2                             | R2        | TGCTCTGG        | ACAGCTGG        | 2                     | P2       | CAGTCTA           | P2       | CAGTCTA           | TAGCAGC         | TGAGAG          | 2                     | P2       | CAGTCTA           | P5       | CGACACTT          |
| 2/15009         | 12.4      | 12-4A          | A3                             | R2        | TGCTCTGG        | ATGCTCTG        | 2                     | P2       | CAGTCTA           | P2       | CAGTCTA           | TGAGCAG         | TGAGAG          | 2                     | P2       | CAGTCTA           | P5       | CGACACTT          |
| 2/15009         | 12.4      | 12-4B          | B3                             | R2        | TGCTCTGG        | TAGCTCTG        | 2                     | P2       | CAGTCTA           | P2       | CAGTCTA           | TAGCAGC         | TGAGAG          | 2                     | P2       | CAGTCTA           | P5       | CGACACTT          |
| 2/15011         | 13.1      | 13-1A          | A2                             | R2        | TGCTCTGG        | AGCAGCTG        | 2                     | P2       | CAGTCTA           | P2       | CAGTCTA           | TCTACTG         | TGAGAG          | 2                     | P2       | CAGTCTA           | P5       | CGACACTT          |
| 2/15011         | 13.1      | 13-1B          | B2                             | R2        | TGCTCTGG        | TACTATGG        | 2                     | P2       | CAGTCTA           | P2       | CAGTCTA           | ATGACTG         | TGAGAG          | 2                     | P2       | CAGTCTA           | P5       | CGACACTT          |
| 2/15011         | 13.2      | 13-2A          | A3                             | R2        | TGCTCTGG        | AGTATCTG        | 3                     | P3       | TTCTCTCT          | P3       | TTCTCTCT          | ACACAGC         | TGAGAG          | 3                     | P3       | TTCTCTCT          | P6       | GATCTTGC          |
| 2/15011         | 13.2      | 13-2B          | B3                             | R2        | TGCTCTGG        | TGAGCTGG        | 3                     | P3       | TTCTCTCT          | P3       | TTCTCTCT          | AGAGTAG         | TGAGAG          | 3                     | P3       | TTCTCTCT          | P6       | GATCTTGC          |
| 2/15011         | 13.3      | 13-3A          | A2                             | R2        | TGCTCTGG        | AACCGAGT        | 3                     | P3       | TTCTCTCT          | P3       | TTCTCTCT          | ATCTATG         | TGAGAG          | 3                     | P3       | TTCTCTCT          | P6       | GATCTTGC          |
| 2/15011         | 13.3      | 13-3B          | B2                             | R2        | TGCTCTGG        | TAGAGAGT        | 3                     | P3       | TTCTCTCT          | P3       | TTCTCTCT          | ACAGTAG         | TGAGAG          | 3                     | P3       | TTCTCTCT          | P6       | GATCTTGC          |
| 2/15011         | 13.4      | 13-4A          | A3                             | R2        | TGCTCTGG        | TCTGATGG        | 3                     | P3       | TTCTCTCT          | P3       | TTCTCTCT          | AAGCAG          | TAGCAGC         | 3                     | P3       | TTCTCTCT          | P6       | GATCTTGC          |
| 2/15011         | 13.4      | 13-4B          | B3                             | R2        | TGCTCTGG        | ATGCATGG        | 3                     | P3       | TTCTCTCT          | P3       | TTCTCTCT          | AGAGAC          | TAGCAGC         | 3                     | P3       | TTCTCTCT          | P6       | GATCTTGC          |
| G015            | 14.4      | 14-4A          | A3                             | R2        | TGCTCTGG        | TCTACTG         | 3                     | P3       | TTCTCTCT          | P3       | TTCTCTCT          | TAGCAGC         | TAGCAGC         | 3                     | P3       | TTCTCTCT          | P6       | GATCTTGC          |
| G015            | 14.4      | 14-4B          | B3                             | R2        | TGCTCTGG        | TAGCAGTG        | 3                     | P3       | TTCTCTCT          | P3       | TTCTCTCT          | TGAGAG          | TAGCAGC         | 3                     | P3       | TTCTCTCT          | P6       | GATCTTGC          |
| G015            | 14.5      | 14-5A          | A2                             | R2        | AGCTGCGG        | TCTCTGTG        | 3                     | P3       | TTCTCTCT          | P3       | TTCTCTCT          | TAGCAGC         | TAGCAGC         | 3                     | P3       | TTCTCTCT          | P6       | GATCTTGC          |
| G015            | 14.5      | 14-5B          | B2                             | R2        | AGCTGCGG        | TGTAAGTG        | 3                     | P3       | TTCTCTCT          | P3       | TTCTCTCT          | TCTACTG         | TAGCAGC         | 3                     | P3       | TTCTCTCT          | P6       | GATCTTGC          |
| G218            | 15.1      | 15-1A          | A2                             | R2        | AGCTGCGG        | TGAGCTGG        | 3                     | P3       | TTCTCTCT          | P3       | TTCTCTCT          | ATGACTG         | TAGCAGC         | 3                     | P3       | TTCTCTCT          | P6       | GATCTTGC          |
| G218            | 15.1      | 15-1B          | B2                             | R2        | AGCTGCGG        | ACAGCTGG        | 3                     | P3       | TTCTCTCT          | P3       | TTCTCTCT          | ACACAGC         | TAGCAGC         | 3                     | P3       | TTCTCTCT          | P6       | GATCTTGC          |
| G218            | 15.2      | 15-2A          | A3                             | R2        | AGCTGCGG        | ATGCTCTG        | 3                     | P3       | TTCTCTCT          | P3       | TTCTCTCT          | AGAGTAG         | TAGCAGC         | 3                     | P3       | TTCTCTCT          | P6       | GATCTTGC          |
| G218            | 15.2      | 15-2B          | B3                             | R2        | AGCTGCGG        | TAGCTCTG        | 3                     | P3       | TTCTCTCT          | P3       | TTCTCTCT          | ATCTATG         | TAGCAGC         | 3                     | P3       | TTCTCTCT          | P6       | GATCTTGC          |
| G220            | 16.1      | 16-1A          | A2                             | R2        | AGCTGCGG        | AGCAGCTG        | 3                     | P3       | TTCTCTCT          | P3       | TTCTCTCT          | ACAGTAG         | TCTACTG         | 3                     | P3       | TTCTCTCT          | P6       | GATCTTGC          |
| G220            | 16.1      | 16-1B          | B2                             | R2        | AGCTGCGG        | TACTATGG        | 3                     | P3       | TTCTCTCT          | P3       | TTCTCTCT          | AAGCAG          | TCTACTG         | 3                     | P3       | TTCTCTCT          | P6       | GATCTTGC          |
| G220            | 16.2      | 16-2A          | A3                             | R2        | AGCTGCGG        | AGTATCTG        | 3                     | P3       | TTCTCTCT          | P3       | TTCTCTCT          | AGAGAC          | TCTACTG         | 3                     | P3       | TTCTCTCT          | P6       | GATCTTGC          |
| G220            | 16.2      | 16-2B          | B3                             | R2        | AGCTGCGG</      |                 |                       |          |                   |          |                   |                 |                 |                       |          |                   |          |                   |

**Table S8:** Summary of the number of 16S rRNA sequence reads obtained per DNA extract following each data processing step.

| Tablet Batch ID | DNA Extract ID | # Sequences Demultiplex and Trim | # Sequences after Quality Filter (deblur) | % Sequences Retained | # Sequences after Control filtering | % Reads Retained |
|-----------------|----------------|----------------------------------|-------------------------------------------|----------------------|-------------------------------------|------------------|
| Lao_05/17       | 2-1A           | 10130                            | 6,205                                     | 61.3                 | 4,253                               | 42.0             |
| Lao_05/17       | 2-1B           | 10954                            | 6,793                                     | 62.0                 | 3,271                               | 29.9             |
| Lao_05/17       | 2-2A           | 14047                            | 8,587                                     | 61.1                 | 6,021                               | 42.9             |
| Lao_05/17       | 2-2B           | 10581                            | 6,668                                     | 63.0                 | 4,137                               | 39.1             |
| Lao_07/04       | 5-1A           | 9746                             | 6,328                                     | 64.9                 | 2,226                               | 22.8             |
| Lao_07/04       | 5-1B           | 19161                            | 11,887                                    | 62.0                 | 3,907                               | 20.4             |
| Lao_07/04       | 5-2A           | 8884                             | 5,782                                     | 65.1                 | 2,170                               | 24.4             |
| Lao_07/04       | 5-2B           | 8082                             | 5,094                                     | 63.0                 | 2,770                               | 34.3             |
| Lao_07/04       | 5-3A           | 7663                             | 4,528                                     | 59.1                 | 1,635                               | 21.3             |
| Lao_07/04       | 5-3B           | 3583                             | 2,044                                     | 57.0                 | 866                                 | 24.2             |
| Lao_07/04       | 5-4A           | 8822                             | 5,743                                     | 65.1                 | 2,745                               | 31.1             |
| Lao_07/04       | 5-4B           | 7437                             | 4,518                                     | 60.8                 | 1,829                               | 24.6             |
| China_07/10     | 6-1A           | 6715                             | 4,287                                     | 63.8                 | 2,100                               | 31.3             |
| China_07/10     | 6-1B           | 8898                             | 5,979                                     | 67.2                 | 3,676                               | 41.3             |
| 2/15044         | 9-1A           | 74832                            | 62,008                                    | 82.9                 | 58,699                              | 78.4             |
| 2/15044         | 9-1B           | 230347                           | 176,391                                   | 76.6                 | 159,258                             | 69.1             |
| 2/15044         | 9-2A           | 34174                            | 47,009                                    | 86.8                 | 46,928                              | 86.6             |
| 2/15044         | 9-2B           | 19078                            | 15,700                                    | 82.3                 | 15,179                              | 79.6             |
| 2/15044         | 9-3A           | 75208                            | 56,182                                    | 74.7                 | 54,547                              | 72.5             |
| 2/15044         | 9-3B           | 57974                            | 45,849                                    | 79.1                 | 37,219                              | 64.2             |
| 2/15044         | 9-4A           | 9601                             | 3,874                                     | 40.3                 | 2,538                               | 26.4             |
| 2/15044         | 9-4B           | 7090                             | 4,217                                     | 59.5                 | 2,079                               | 29.3             |
| 15057           | 10-1A          | 35212                            | 27,826                                    | 79.0                 | 23,622                              | 67.1             |
| 15057           | 10-1B          | 119291                           | 92,933                                    | 77.9                 | 85,411                              | 71.6             |
| 15057           | 10-2A          | 60897                            | 47,488                                    | 78.0                 | 46,163                              | 75.8             |
| 15057           | 10-2B          | 115220                           | 93,195                                    | 80.9                 | 82,598                              | 71.7             |
| 15057           | 10-3A          | 3677                             | 2,767                                     | 75.3                 | 2,754                               | 74.9             |
| G015            | 10-3B          | 19092                            | 16,173                                    | 84.7                 | 15,128                              | 79.2             |
| 15057           | 10-4A          | 6088                             | 3,587                                     | 58.9                 | 2,327                               | 38.2             |
| 15057           | 10-4B          | 7253                             | 4,499                                     | 62.0                 | 2,262                               | 31.2             |
| 15057           | 10-5A          | 10671                            | 6,136                                     | 57.5                 | 4,546                               | 42.6             |
| 15057           | 10-5B          | 9776                             | 6,198                                     | 63.4                 | 4,429                               | 45.3             |
| 2/15058         | 11-1A          | 21181                            | 13,645                                    | 64.4                 | 8,182                               | 38.6             |
| 2/15058         | 11-1B          | 17464                            | 11,097                                    | 63.5                 | 4,114                               | 23.6             |
| 2/15058         | 11-2A          | 27116                            | 17,020                                    | 62.8                 | 10,596                              | 39.1             |
| 2/15058         | 11-2B          | 18690                            | 12,157                                    | 65.0                 | 7,222                               | 38.6             |
| 2/15058         | 11-3A          | 16863                            | 10,516                                    | 62.4                 | 7,751                               | 46.0             |
| 2/15058         | 11-3B          | 7876                             | 4,924                                     | 62.5                 | 2,737                               | 34.8             |
| 2/15058         | 11-4A          | 17860                            | 10,617                                    | 59.4                 | 8,782                               | 49.2             |
| 2/15058         | 11-4B          | 19937                            | 13,993                                    | 70.2                 | 7,101                               | 35.6             |
| 2/15058         | 11-5A          | 14523                            | 9,024                                     | 62.1                 | 7,518                               | 51.8             |
| 2/15058         | 11-5B          | 17195                            | 11,583                                    | 67.4                 | 3,756                               | 21.8             |
| 2/15009         | 12-1A          | 17380                            | 10,861                                    | 62.5                 | 6,208                               | 35.7             |
| 2/15009         | 12-1B          | 18177                            | 11,593                                    | 63.8                 | 6,329                               | 34.8             |
| 2/15009         | 12-2A          | 14980                            | 11,949                                    | 79.8                 | 6,150                               | 41.1             |
| 2/15009         | 12-2B          | 16147                            | 12,330                                    | 76.4                 | 4,308                               | 26.7             |
| 2/15009         | 12-3A          | 27351                            | 20,631                                    | 75.4                 | 10,698                              | 39.1             |
| 2/15009         | 12-3B          | 22523                            | 16,318                                    | 72.5                 | 8,560                               | 38.0             |
| 2/15009         | 12-4A          | 23800                            | 18,435                                    | 77.5                 | 9,023                               | 37.9             |
| 2/15009         | 12-4B          | 20279                            | 14,874                                    | 73.3                 | 2,606                               | 12.9             |
| 2/15011         | 13-1A          | 28909                            | 20,516                                    | 71.0                 | 10,378                              | 35.9             |
| 2/15011         | 13-1B          | 22613                            | 16,246                                    | 71.8                 | 8,543                               | 37.8             |
| 2/15011         | 13-2A          | 56025                            | 42,734                                    | 76.3                 | 21,010                              | 37.5             |
| 2/15011         | 13-2B          | 9334                             | 7,013                                     | 75.1                 | 2,802                               | 30.0             |
| 2/15011         | 13-3A          | 24938                            | 18,867                                    | 75.7                 | 11,775                              | 47.2             |
| 2/15011         | 13-3B          | 23003                            | 16,749                                    | 72.8                 | 7,858                               | 34.2             |
| 2/15011         | 13-4A          | 16215                            | 11,941                                    | 73.6                 | 6,204                               | 38.3             |
| 2/15011         | 13-4B          | 20281                            | 15,401                                    | 75.9                 | 6,004                               | 29.6             |
| G015            | 14-1A          | 143616                           | 115,558                                   | 80.5                 | 103,780                             | 72.3             |
| G015            | 14-1B          | 7541                             | 5,279                                     | 70.0                 | 5,001                               | 66.3             |
| G015            | 14-2A          | 229346                           | 171,866                                   | 74.9                 | 162,083                             | 70.7             |
| G015            | 14-2B          | 277762                           | 221,801                                   | 79.9                 | 214,488                             | 77.2             |
| G015            | 14-3A          | 83013                            | 61,010                                    | 73.5                 | 59,484                              | 71.7             |
| 2/15044?        | 14-3B          | 52407                            | 42,333                                    | 80.8                 | 39,580                              | 75.5             |
| G015            | 14-4A          | 17661                            | 12,857                                    | 72.8                 | 4,518                               | 25.6             |
| G015            | 14-4B          | 18127                            | 13,033                                    | 71.9                 | 4,572                               | 25.2             |
| G015            | 14-5A          | 18541                            | 14,080                                    | 75.9                 | 5,096                               | 27.5             |
| G015            | 14-5B          | 20214                            | 14,386                                    | 71.2                 | 4,640                               | 23.0             |
| G218            | 15-1A          | 29658                            | 21,329                                    | 71.9                 | 3,930                               | 13.3             |
| G218            | 15-1B          | 27159                            | 18,859                                    | 69.4                 | 4,130                               | 15.2             |
| G218            | 15-2A          | 21871                            | 15,854                                    | 72.5                 | 2,792                               | 12.8             |
| G218            | 15-2B          | 24176                            | 17,586                                    | 72.7                 | 4,278                               | 17.7             |
| G220            | 16-1A          | 26497                            | 18,797                                    | 70.9                 | 3,703                               | 14.0             |
| G220            | 16-1B          | 18921                            | 14,996                                    | 79.3                 | 4,011                               | 21.2             |
| G220            | 16-2A          | 30479                            | 21,579                                    | 70.8                 | 4,958                               | 16.3             |
| G220            | 16-2B          | 10995                            | 7,854                                     | 71.4                 | 1,451                               | 13.2             |
| NA              | EBC-1A         | 25564                            | 21,468                                    | 84.0                 | NA                                  | NA               |
| NA              | EBC-1B         | 23067                            | 18,550                                    | 80.4                 | NA                                  | NA               |
| NA              | EBC-2A         | 12603                            | 9,752                                     | 77.4                 | NA                                  | NA               |
| NA              | EBC-2B         | 17673                            | 14,564                                    | 82.4                 | NA                                  | NA               |
| NA              | EBC-A1         | 155848                           | 118,774                                   | 76.2                 | NA                                  | NA               |
| NA              | EBC-A2         | 20702                            | 16,528                                    | 79.8                 | NA                                  | NA               |
| NA              | EBC-B1         | 324775                           | 247,414                                   | 76.2                 | NA                                  | NA               |
| NA              | EBC-B2         | 24559                            | 19,769                                    | 80.5                 | NA                                  | NA               |
|                 | PCRNEG1        | 124                              | 67                                        | 54.0                 | NA                                  | NA               |

**Table S9:** Summary of the number of 18S rRNA sequence reads obtained per DNA extract following each data processing step.

| Tablet Batch ID | DNA Extract ID | # Sequences Demultiplex and Trim | # Sequences after Quality Filter (dada2) | % Sequences Retained | # Sequences after Control filtering | % Reads Retained |
|-----------------|----------------|----------------------------------|------------------------------------------|----------------------|-------------------------------------|------------------|
| Lao_05/17       | 2-1A           | 26955                            | 25,198                                   | 93.5                 | 16037                               | 59.50            |
| Lao_05/17       | 2-1B           | 24488                            | 24,068                                   | 98.3                 | 10457                               | 42.70            |
| Lao_05/17       | 2-2A           | 8157                             | 7,939                                    | 97.3                 | 5,605                               | 68.71            |
| Lao_05/17       | 2-2B           | 16431                            | 16,381                                   | 99.7                 | 11,309                              | 68.83            |
| Lao_07/04       | 5-1A           | 11145                            | 11,053                                   | 99.2                 | 2,606                               | 23.38            |
| Lao_07/04       | 5-1B           | 8202                             | 8,160                                    | 99.5                 | 2,051                               | 25.01            |
| Lao_07/04       | 5-2A           | 33152                            | 32,354                                   | 97.6                 | 10,683                              | 32.22            |
| Lao_07/04       | 5-2B           | 15791                            | 15,761                                   | 99.8                 | 7,032                               | 44.53            |
| Lao_07/04       | 5-3A           | 15053                            | 15,000                                   | 99.6                 | 4,700                               | 31.22            |
| Lao_07/04       | 5-3B           | 15742                            | 15,611                                   | 99.2                 | 4,088                               | 25.97            |
| Lao_07/04       | 5-4A           | 25077                            | 24,637                                   | 98.2                 | 8,093                               | 32.27            |
| Lao_07/04       | 5-4B           | 43922                            | 42,763                                   | 97.4                 | 15,026                              | 34.21            |
| China_07/10     | 6-1A           | 43471                            | 42,512                                   | 97.8                 | 20,632                              | 47.46            |
| China_07/10     | 6-1B           | 20375                            | 20,264                                   | 99.5                 | 9,997                               | 49.07            |
| 2/15044         | 9-1A           | 841                              | 722                                      | 85.9                 | 230                                 | 27.35            |
| 2/15044         | 9-1B           | 251469                           | 14,403                                   | 5.7                  | 8,490                               | 3.38             |
| 2/15044         | 9-2A           | 88052                            | 985                                      | 1.1                  | 520                                 | 0.59             |
| 2/15044         | 9-2B           | 63844                            | 171                                      | 0.3                  | 162                                 | 0.25             |
| 2/15044         | 9-3A           | 233719                           | 206,037                                  | 88.2                 | 74,922                              | 32.06            |
| 2/15044         | 9-3B           | 303                              | 239                                      | 85.5                 | 160                                 | 52.81            |
| 2/15044         | 9-4A           | 30274                            | 29,721                                   | 98.2                 | 11,021                              | 36.40            |
| 2/15044         | 9-4B           | 22993                            | 22,687                                   | 98.7                 | 6,147                               | 26.73            |
| 15057           | 10-1A          | 51551                            | 50,581                                   | 98.1                 | 13,027                              | 25.27            |
| 15057           | 10-1B          | 20799                            | 20,236                                   | 97.3                 | 5,129                               | 24.66            |
| 15057           | 10-2A          | 2658                             | 272                                      | 10.2                 | 12                                  | 0.45             |
| 15057           | 10-2B          | 23251                            | 21,438                                   | 92.2                 | 8,633                               | 37.13            |
| 15057           | 10-3A          | 4086                             | 175                                      | 4.3                  | 26                                  | 0.64             |
| 15057           | 10-3B          | 56768                            | 55,284                                   | 97.4                 | 29,904                              | 52.68            |
| 15057           | 10-4A          | 19087                            | 18,959                                   | 99.3                 | 5,526                               | 28.95            |
| 15057           | 10-4B          | 119910                           | 116,152                                  | 96.9                 | 32,411                              | 27.03            |
| 15057           | 10-5A          | 28980                            | 28,803                                   | 99.4                 | 14,717                              | 50.78            |
| 15057           | 10-5B          | 31388                            | 31,203                                   | 99.4                 | 15,857                              | 50.52            |
| 2/15058         | 11-1A          | 110575                           | 107,474                                  | 97.2                 | 27,791                              | 25.13            |
| 2/15058         | 11-1B          | 90803                            | 88,636                                   | 97.6                 | 28,551                              | 31.44            |
| 2/15058         | 11-2A          | 19893                            | 19,785                                   | 99.5                 | 8,324                               | 41.84            |
| 2/15058         | 11-2B          | 22027                            | 21,820                                   | 99.1                 | 7,104                               | 32.25            |
| 2/15058         | 11-3A          | 13299                            | 6,715                                    | 50.5                 | 2,310                               | 17.37            |
| 2/15058         | 11-3B          | 23336                            | 23,141                                   | 99.2                 | 9,375                               | 40.17            |
| 2/15058         | 11-4A          | 17424                            | 17,309                                   | 99.3                 | 10,310                              | 59.17            |
| 2/15058         | 11-4B          | 33884                            | 17,987                                   | 53.1                 | 9,297                               | 27.44            |
| 2/15058         | 11-5A          | 32724                            | 32,423                                   | 99.1                 | 14,710                              | 44.95            |
| 2/15058         | 11-5B          | 23388                            | 23,241                                   | 99.4                 | 14,655                              | 62.66            |
| 2/15009         | 12-1A          | 21697                            | 21,587                                   | 99.5                 | 7,413                               | 34.17            |
| 2/15009         | 12-1B          | 50591                            | 49,351                                   | 97.5                 | 18,006                              | 35.59            |
| 2/15009         | 12-2A          | 18650                            | 18,604                                   | 99.8                 | 9,631                               | 51.64            |
| 2/15009         | 12-2B          | 31500                            | 31,395                                   | 99.7                 | 17,868                              | 56.72            |
| 2/15009         | 12-3A          | 33601                            | 32,768                                   | 97.5                 | 9,935                               | 29.57            |
| 2/15009         | 12-3B          | 22823                            | 22,299                                   | 97.7                 | 5,629                               | 24.66            |
| 2/15009         | 12-4A          | 38567                            | 38,252                                   | 99.2                 | 17,239                              | 44.70            |
| 2/15009         | 12-4B          | 30802                            | 30,378                                   | 98.6                 | 15,601                              | 50.65            |
| 2/15011         | 13-1A          | 24229                            | 23,878                                   | 98.6                 | 7,482                               | 30.88            |
| 2/15011         | 13-1B          | 41548                            | 40,375                                   | 97.2                 | 12,024                              | 28.94            |
| 2/15011         | 13-2A          | 26774                            | 26,454                                   | 98.8                 | 13,581                              | 50.72            |
| 2/15011         | 13-2B          | 35882                            | 35,645                                   | 99.3                 | 14,799                              | 41.24            |
| 2/15011         | 13-3A          | 75266                            | 72,855                                   | 96.8                 | 22,406                              | 29.77            |
| 2/15011         | 13-3B          | 29993                            | 29,233                                   | 97.5                 | 8,493                               | 28.32            |
| 2/15011         | 13-4A          | 28598                            | 27,958                                   | 97.8                 | 9,475                               | 33.13            |
| 2/15011         | 13-4B          | 31097                            | 30,409                                   | 97.8                 | 13,573                              | 43.65            |
| G015            | 14-1A          | 2399                             | 1,705                                    | 71.1                 | 312                                 | 13.01            |
| G015            | 14-1B          | 23418                            | 121                                      | 0.5                  | 0                                   | 0.00             |
| G015            | 14-2A          | 36858                            | 25,176                                   | 68.3                 | 12,639                              | 34.29            |
| G015            | 14-2B          | 22296                            | 85                                       | 0.4                  | 85                                  | 0.38             |
| G015            | 14-3A          | 30842                            | 90                                       | 0.3                  | 3                                   | 0.01             |
| G015            | 14-3B          | 1624                             | 1,402                                    | 86.3                 | 396                                 | 24.38            |
| G015            | 14-4A          | 20780                            | 20,276                                   | 97.6                 | 3,237                               | 15.58            |
| G015            | 14-4B          | 25495                            | 25,125                                   | 98.5                 | 5,704                               | 22.37            |
| G015            | 14-5A          | 18208                            | 17,781                                   | 97.7                 | 3,583                               | 19.68            |
| G015            | 14-5B          | 15833                            | 15,587                                   | 98.4                 | 2,799                               | 17.68            |
| G018            | 15-1A          | 26829                            | 25,524                                   | 95.1                 | 2,083                               | 7.76             |
| G018            | 15-1B          | 23283                            | 22,549                                   | 96.8                 | 2,730                               | 11.73            |
| G018            | 15-2A          | 26198                            | 24,719                                   | 94.4                 | 3,070                               | 11.72            |
| G018            | 15-2B          | 25424                            | 24,270                                   | 95.5                 | 2,634                               | 10.36            |
| G020            | 16-1A          | 8664                             | 8,424                                    | 97.2                 | 631                                 | 7.28             |
| G020            | 16-1B          | 21020                            | 20,323                                   | 96.7                 | 2,288                               | 10.88            |
| G020            | 16-2A          | 19817                            | 18,736                                   | 94.5                 | 2,490                               | 12.56            |
| G020            | 16-2B          | 31901                            | 14,212                                   | 44.6                 | 1,116                               | 3.50             |
| NA              | EBC-1A         | 23002                            | 22,811                                   | 99.2                 | NA                                  | NA               |
| NA              | EBC-1B         | 20113                            | 19,854                                   | 98.7                 | NA                                  | NA               |
| NA              | EBC-2A         | 29135                            | 14,113                                   | 48.4                 | NA                                  | NA               |
| NA              | EBC-2B         | 25886                            | 25,620                                   | 99.0                 | NA                                  | NA               |
| NA              | EBC-A2         | 164777                           | 661                                      | 0.4                  | NA                                  | NA               |
| NA              | EBC-B1         | 48467                            | 360                                      | 0.7                  | NA                                  | NA               |
| NA              | EBC-B2         | 38241                            | 24,768                                   | 64.8                 | NA                                  | NA               |
| NA              | PCRNEG1        | 14                               | 11                                       | 78.6                 | NA                                  | NA               |

**Table S10:** Details of the barcodes and indexes used for the whole mitochondrial genome analysis.

| Extract ID | Lib Prep Method            | Extract Volume Used | Y-adaptor Well# | Internal Barcode | MITO_HYBCAP POOL | P7 Index primer ID | P7 Index primer sequence | P5 Index Primer ID | P5 Index Primer ID sequence |
|------------|----------------------------|---------------------|-----------------|------------------|------------------|--------------------|--------------------------|--------------------|-----------------------------|
| 10-4A      | FS (Fragmentase)           | 25uL                | A1              | AACAAACG         | 1                | P7_primer_idx004   | GCTACAAC                 | P5_primer_idx010   | ATCATGCC                    |
| 10-4B      | FS (Fragmentase)           | 25uL                | B1              | CACGCTCA         | 1                | P7_primer_idx004   | GCTACAAC                 | P5_primer_idx010   | ATCATGCC                    |
| 11-2A      | FS (Fragmentase)           | 25uL                | C1              | TTCTCTCT         | 1                | P7_primer_idx004   | GCTACAAC                 | P5_primer_idx010   | ATCATGCC                    |
| 11-4B      | FS (Fragmentase)           | 25uL                | D1              | GCTACAAC         | 1                | P7_primer_idx004   | GCTACAAC                 | P5_primer_idx010   | ATCATGCC                    |
| 12-1B      | FS (Fragmentase)           | 25uL                | E1              | CGACACTT         | 1                | P7_primer_idx004   | GCTACAAC                 | P5_primer_idx010   | ATCATGCC                    |
| 12-2A      | FS (Fragmentase)           | 25uL                | F1              | GATCTTGC         | 1                | P7_primer_idx004   | GCTACAAC                 | P5_primer_idx010   | ATCATGCC                    |
| 13-2A      | FS (Fragmentase)           | 25uL                | G1              | TGCTTGCT         | 1                | P7_primer_idx004   | GCTACAAC                 | P5_primer_idx010   | ATCATGCC                    |
| LIB_NEG_1  | FS (Fragmentase)           | 25uL                | H1              | CCAACACT         | 1                | P7_primer_idx004   | GCTACAAC                 | P5_primer_idx010   | ATCATGCC                    |
| 10-4A      | No Fragmentase/half volume | 25uL                | A2              | CTAGCTCA         | 1                | P7_primer_idx004   | GCTACAAC                 | P5_primer_idx010   | ATCATGCC                    |
| 10-4B      | No Fragmentase/half volume | 25uL                | B2              | ATCATGCC         | 1                | P7_primer_idx004   | GCTACAAC                 | P5_primer_idx010   | ATCATGCC                    |
| 11-2A      | No Fragmentase/half volume | 25uL                | C2              | CAGCTAGA         | 1                | P7_primer_idx004   | GCTACAAC                 | P5_primer_idx010   | ATCATGCC                    |
| 11-4B      | No Fragmentase/half volume | 25uL                | D2              | TTGCGAGA         | 1                | P7_primer_idx004   | GCTACAAC                 | P5_primer_idx010   | ATCATGCC                    |
| 12-1B      | No Fragmentase/half volume | 25uL                | E2              | GCGGAATA         | 1                | P7_primer_idx004   | GCTACAAC                 | P5_primer_idx010   | ATCATGCC                    |
| 12-2A      | No Fragmentase/half volume | 25uL                | F2              | TACGACGT         | 1                | P7_primer_idx004   | GCTACAAC                 | P5_primer_idx010   | ATCATGCC                    |
| 13-2A      | No Fragmentase/half volume | 25uL                | G2              | CCAACCTC         | 1                | P7_primer_idx004   | GCTACAAC                 | P5_primer_idx010   | ATCATGCC                    |
| LIB_NEG_2  | No Fragmentase/half volume | 25uL                | H2              | AGACATGC         | 1                | P7_primer_idx004   | GCTACAAC                 | P5_primer_idx010   | ATCATGCC                    |
| 11-1A      | No Fragmentase/half volume | 25uL                | A3              | CCTATTGG         | 1                | P7_primer_idx004   | GCTACAAC                 | P5_primer_idx010   | ATCATGCC                    |
| 11-1B      | No Fragmentase/half volume | 25uL                | B3              | TCTAGGAG         | 1                | P7_primer_idx004   | GCTACAAC                 | P5_primer_idx010   | ATCATGCC                    |
| 11-2B      | No Fragmentase/half volume | 25uL                | C3              | GATCTCAG         | 1                | P7_primer_idx004   | GCTACAAC                 | P5_primer_idx010   | ATCATGCC                    |
| 11-3A      | No Fragmentase/half volume | 25uL                | D3              | AACCTGCC         | 1                | P7_primer_idx004   | GCTACAAC                 | P5_primer_idx010   | ATCATGCC                    |
| 11-3B      | No Fragmentase/half volume | 25uL                | E3              | ACACGAGA         | 1                | P7_primer_idx004   | GCTACAAC                 | P5_primer_idx010   | ATCATGCC                    |
| 11-4A      | No Fragmentase/half volume | 25uL                | F3              | CATCCAAG         | 1                | P7_primer_idx004   | GCTACAAC                 | P5_primer_idx010   | ATCATGCC                    |
| 11-5A      | No Fragmentase/half volume | 25uL                | G3              | CAAGGTAC         | 1                | P7_primer_idx004   | GCTACAAC                 | P5_primer_idx010   | ATCATGCC                    |
| 11-5B      | No Fragmentase/half volume | 25uL                | H3              | GTCTTAAG         | 1                | P7_primer_idx004   | GCTACAAC                 | P5_primer_idx010   | ATCATGCC                    |
| 12-1A      | No Fragmentase/half volume | 25uL                | A4              | CCTCATCT         | 1                | P7_primer_idx004   | GCTACAAC                 | P5_primer_idx010   | ATCATGCC                    |
| 12-2B      | No Fragmentase/half volume | 25uL                | B4              | AATCCAGC         | 1                | P7_primer_idx004   | GCTACAAC                 | P5_primer_idx010   | ATCATGCC                    |
| 12-3A      | No Fragmentase/half volume | 25uL                | C4              | ACAGTTCG         | 1                | P7_primer_idx004   | GCTACAAC                 | P5_primer_idx010   | ATCATGCC                    |
| 12-3B      | No Fragmentase/half volume | 25uL                | D4              | CAACTCCA         | 1                | P7_primer_idx004   | GCTACAAC                 | P5_primer_idx010   | ATCATGCC                    |
| 12-4A      | No Fragmentase/half volume | 25uL                | E4              | CAATGCCA         | 1                | P7_primer_idx004   | GCTACAAC                 | P5_primer_idx010   | ATCATGCC                    |
| 12-4B      | No Fragmentase/half volume | 25uL                | F4              | GATGGAGT         | 1                | P7_primer_idx004   | GCTACAAC                 | P5_primer_idx010   | ATCATGCC                    |
| 13-1A      | No Fragmentase/half volume | 25uL                | G4              | TTGGAAGC         | 1                | P7_primer_idx004   | GCTACAAC                 | P5_primer_idx010   | ATCATGCC                    |
| 13-1B      | No Fragmentase/half volume | 25uL                | H4              | CCGAAGAT         | 1                | P7_primer_idx004   | GCTACAAC                 | P5_primer_idx010   | ATCATGCC                    |
| 13-2B      | No Fragmentase/half volume | 25uL                | A5              | ACTGCTTG         | 1                | P7_primer_idx004   | GCTACAAC                 | P5_primer_idx010   | ATCATGCC                    |
| 13-3A      | No Fragmentase/half volume | 25uL                | B5              | AGGTTCTC         | 1                | P7_primer_idx004   | GCTACAAC                 | P5_primer_idx010   | ATCATGCC                    |
| 13-3B      | No Fragmentase/half volume | 25uL                | C5              | ACGCACTA         | 1                | P7_primer_idx004   | GCTACAAC                 | P5_primer_idx010   | ATCATGCC                    |
| 13-4A      | No Fragmentase/half volume | 25uL                | D5              | GGACTACT         | 1                | P7_primer_idx004   | GCTACAAC                 | P5_primer_idx010   | ATCATGCC                    |
| 13-4B      | No Fragmentase/half volume | 25uL                | E5              | GGCACTCT         | 1                | P7_primer_idx004   | GCTACAAC                 | P5_primer_idx010   | ATCATGCC                    |
| 10-1A      | No Fragmentase/half volume | 25uL                | F5              | CACAGACT         | 1                | P7_primer_idx004   | GCTACAAC                 | P5_primer_idx010   | ATCATGCC                    |
| 10-1B      | No Fragmentase/half volume | 25uL                | G5              | CGATTGGA         | 1                | P7_primer_idx004   | GCTACAAC                 | P5_primer_idx010   | ATCATGCC                    |
| 10-2A      | No Fragmentase/half volume | 25uL                | H5              | GACTTGTG         | 1                | P7_primer_idx004   | GCTACAAC                 | P5_primer_idx010   | ATCATGCC                    |
| 10-2B      | No Fragmentase/half volume | 25uL                | A6              | GAGGCATT         | 1                | P7_primer_idx004   | GCTACAAC                 | P5_primer_idx010   | ATCATGCC                    |
| 10-3A      | No Fragmentase/half volume | 25uL                | B6              | GCCTTAGA         | 1                | P7_primer_idx004   | GCTACAAC                 | P5_primer_idx010   | ATCATGCC                    |
| 10-3B      | No Fragmentase/half volume | 25uL                | C6              | ACGGACTT         | 1                | P7_primer_idx004   | GCTACAAC                 | P5_primer_idx010   | ATCATGCC                    |
| 10-5A      | No Fragmentase/half volume | 25uL                | D6              | ATTAGCCG         | 1                | P7_primer_idx004   | GCTACAAC                 | P5_primer_idx010   | ATCATGCC                    |
| 10-5B      | No Fragmentase/half volume | 25uL                | E6              | ACAGGAA          | 1                | P7_primer_idx004   | GCTACAAC                 | P5_primer_idx010   | ATCATGCC                    |
| 9-1B       | No Fragmentase/half volume | 25uL                | F6              | AGGAACAC         | 1                | P7_primer_idx004   | GCTACAAC                 | P5_primer_idx010   | ATCATGCC                    |
| 9-1A       | No Fragmentase/half volume | 25uL                | G6              | AGCCGTAA         | 1                | P7_primer_idx004   | GCTACAAC                 | P5_primer_idx010   | ATCATGCC                    |
| 9-2A       | No Fragmentase/half volume | 25uL                | H6              | ACTCTCCA         | 1                | P7_primer_idx004   | GCTACAAC                 | P5_primer_idx010   | ATCATGCC                    |
| 9-2B       | No Fragmentase/half volume | 25uL                | A7              | GTCTTGA          | 1                | P7_primer_idx004   | GCTACAAC                 | P5_primer_idx010   | ATCATGCC                    |
| 9-3A       | No Fragmentase/half volume | 25uL                | B7              | TAGAACC          | 1                | P7_primer_idx004   | GCTACAAC                 | P5_primer_idx010   | ATCATGCC                    |
| 9-3B       | No Fragmentase/half volume | 25uL                | C7              | CGTCAAGA         | 1                | P7_primer_idx004   | GCTACAAC                 | P5_primer_idx010   | ATCATGCC                    |
| 9-4A       | No Fragmentase/half volume | 25uL                | D7              | CTGCCATA         | 1                | P7_primer_idx004   | GCTACAAC                 | P5_primer_idx010   | ATCATGCC                    |
| 9-4B       | No Fragmentase/half volume | 25uL                | E7              | GGTGATGA         | 1                | P7_primer_idx004   | GCTACAAC                 | P5_primer_idx010   | ATCATGCC                    |
| 6-1A       | No Fragmentase/half volume | 25uL                | F7              | ACAGAGGT         | 1                | P7_primer_idx004   | GCTACAAC                 | P5_primer_idx010   | ATCATGCC                    |
| 6-1B       | No Fragmentase/half volume | 25uL                | G7              | CCTTCAT          | 1                | P7_primer_idx004   | GCTACAAC                 | P5_primer_idx010   | ATCATGCC                    |
| LIB_Neg_3  | No Fragmentase/half volume | 25uL                | H7              | CGAAGTCA         | 1                | P7_primer_idx004   | GCTACAAC                 | P5_primer_idx010   | ATCATGCC                    |
| EBC-A1     | No Fragmentase/half volume | 25uL                | A8              | CGCAATGT         | 2                | P7_primer_idx004   | GCTACAAC                 | P5_primer_idx010   | ATCATGCC                    |
| EBC-A2     | No Fragmentase/half volume | 25uL                | B8              | GAAGACTG         | 2                | P7_primer_idx004   | GCTACAAC                 | P5_primer_idx010   | ATCATGCC                    |
| EBC-B2     | No Fragmentase/half volume | 25uL                | C8              | ACCATAGG         | 2                | P7_primer_idx004   | GCTACAAC                 | P5_primer_idx010   | ATCATGCC                    |
| EBC010817  | No Fragmentase/half volume | 25uL                | D8              | CGGAGTAT         | 2                | P7_primer_idx004   | GCTACAAC                 | P5_primer_idx010   | ATCATGCC                    |
| EBC1A      | No Fragmentase/half volume | 25uL                | E8              | AGCGTGTGA        | 2                | P7_primer_idx004   | GCTACAAC                 | P5_primer_idx010   | ATCATGCC                    |
| EBC1B      | No Fragmentase/half volume | 25uL                | F8              | TGCTGTGA         | 2                | P7_primer_idx004   | GCTACAAC                 | P5_primer_idx010   | ATCATGCC                    |
| EBC2A      | No Fragmentase/half volume | 25uL                | G8              | TGGTATCC         | 2                | P7_primer_idx004   | GCTACAAC                 | P5_primer_idx010   | ATCATGCC                    |
| EBC2B      | No Fragmentase/half volume | 25uL                | H8              | AACAGGTG         | 2                | P7_primer_idx004   | GCTACAAC                 | P5_primer_idx010   | ATCATGCC                    |
| 5-1A       | No Fragmentase/half volume | 25uL                | A9              | ATGGCGAT         | 2                | P7_primer_idx004   | GCTACAAC                 | P5_primer_idx010   | ATCATGCC                    |
| 5-1B       | No Fragmentase/half volume | 25uL                | B9              | AATGGTCG         | 2                | P7_primer_idx004   | GCTACAAC                 | P5_primer_idx010   | ATCATGCC                    |
| 5-2A       | No Fragmentase/half volume | 25uL                | C9              | GGTGAAC          | 2                | P7_primer_idx004   | GCTACAAC                 | P5_primer_idx010   | ATCATGCC                    |
| 5-2B       | No Fragmentase/half volume | 25uL                | D9              | YCCATAG          | 2                | P7_primer_idx004   | GCTACAAC                 | P5_primer_idx010   | ATCATGCC                    |
| 5-3A       | No Fragmentase/half volume | 25uL                | E9              | AGAACCAG         | 2                | P7_primer_idx004   | GCTACAAC                 | P5_primer_idx010   | ATCATGCC                    |
| 5-3B       | No Fragmentase/half volume | 25uL                | F9              | AACCGAAC         | 2                | P7_primer_idx004   | GCTACAAC                 | P5_primer_idx010   | ATCATGCC                    |
| 5-4A       | No Fragmentase/half volume | 25uL                | G9              | CTGTACCA         | 2                | P7_primer_idx004   | GCTACAAC                 | P5_primer_idx010   | ATCATGCC                    |
| 5-4B       | No Fragmentase/half volume | 25uL                | H9              | CTTACAGC         | 2                | P7_primer_idx004   | GCTACAAC                 | P5_primer_idx010   | ATCATGCC                    |
| 2-1A       | No Fragmentase/half volume | 25uL                | A10             | AACAAGGC         | 2                | P7_primer_idx004   | GCTACAAC                 | P5_primer_idx010   | ATCATGCC                    |
| 2-1B       | No Fragmentase/half volume | 25uL                | B10             | CCTTGGAA         | 2                | P7_primer_idx004   | GCTACAAC                 | P5_primer_idx010   | ATCATGCC                    |
| 2-2A       | No Fragmentase/half volume | 25uL                | C10             | AAGCTGGT         | 2                | P7_primer_idx004   | GCTACAAC                 | P5_primer_idx010   | ATCATGCC                    |
| 2-2B       | No Fragmentase/half volume | 25uL                | D10             | CCAAGTAG         | 2                | P7_primer_idx004   | GCTACAAC                 | P5_primer_idx010   | ATCATGCC                    |
| 16-1A      | No Fragmentase/half volume | 25uL                | E10             | GTACACCT         | 2                | P7_primer_idx004   | GCTACAAC                 | P5_primer_idx010   | ATCATGCC                    |
| 16-1B      | No Fragmentase/half volume | 25uL                | F10             | AAGACGGG         | 2                | P7_primer_idx004   | GCTACAAC                 | P5_primer_idx010   | ATCATGCC                    |
| 16-2A      | No Fragmentase/half volume | 25uL                | G10             | CGGCATTA         | 2                | P7_primer_idx004   | GCTACAAC                 | P5_primer_idx010   | ATCATGCC                    |
| 16-2B      | No Fragmentase/half volume | 25uL                | H10             | AATTCGGG         | 2                | P7_primer_idx004   | GCTACAAC                 | P5_primer_idx010   | ATCATGCC                    |
| 15-1A      | No Fragmentase/half volume | 25uL                | A11             | ATGCGTCA         | 2                | P7_primer_idx004   | GCTACAAC                 | P5_primer_idx010   | ATCATGCC                    |
| 15-1B      | No Fragmentase/half volume | 25uL                | B11             | AGCCTATC         | 2                | P7_primer_idx004   | GCTACAAC                 | P5_primer_idx010   | ATCATGCC                    |
| 15-2A      | No Fragmentase/half volume | 25uL                | C11             | CTCAGAAG         | 2                | P7_primer_idx004   | GCTACAAC                 | P5_primer_idx010   | ATCATGCC                    |
| 15-2B      | No Fragmentase/half volume | 25uL                | D11             | CTCCTAGT         | 2                | P7_primer_idx004   | GCTACAAC                 | P5_primer_idx010   | ATCATGCC                    |
| 14-1A      | No Fragmentase/half volume | 25uL                | E11             | GTAAACCGA        | 2                | P7_primer_idx004   | GCTACAAC                 | P5_primer_idx010   | ATCATGCC                    |
| 14-1B      | No Fragmentase/half volume | 25uL                | F11             | CCGATGTA         | 2                | P7_primer_idx004   | GCTACAAC                 | P5_primer_idx010   | ATCATGCC                    |
| 14-2A      | No Fragmentase/half volume | 25uL                | G11             | GGAAACATG        | 2                | P7_primer_idx004   | GCTACAAC                 | P5_primer_idx010   | ATCATGCC                    |
| 14-2B      | No Fragmentase/half volume | 25uL                | H11             | CCACATTTG        | 2                | P7_primer_idx004   | GCTACAAC                 | P5_primer_idx010   | ATCATGCC                    |
| 14-3A      | No Fragmentase/half volume | 25uL                | A12             | CTTACGCA         | 2                | P7_primer_idx004   | GCTACAAC                 | P5_primer_idx010   | ATCATGCC                    |
| 14-3B      | No Fragmentase/half volume | 25uL                | B12             | CTCTTCTT         | 2                | P7_primer_idx004   | GCTACAAC                 | P5_primer_idx010   | ATCATGCC                    |
| 14-4A      | No Fragmentase/half volume | 25uL                | C12             | TCAGCCTT         | 2                | P7_primer_idx004   | GCTACAAC                 | P5_primer_idx010   | ATCATGCC                    |
| 14-4B      | No Fragmentase/half volume | 25uL                | D12             | CGAGTTAG         | 2                | P7_primer_idx004   | GCTACAAC                 | P5_primer_idx010   | ATCATGCC                    |
| 14-5A      | No Fragmentase/half volume | 25uL                | E12             | AGTCGAAG         | 2                | P7_primer_idx004   | GCTACAAC                 | P5_primer_idx010   | ATCATGCC                    |
| 14-5B      | No Fragmentase/half volume | 25uL                | F12             | CACCTCAC         | 2                | P7_primer_idx004   | GCTACAAC                 | P5_primer_idx010   | ATCATGCC                    |
| LIB_NEG_4  | No Fragmentase/half volume | 25uL                | G12             | CCTACCTA         | 2                | P7_primer_idx004   | GCTACAAC                 | P5_primer_idx010   | ATCATGCC                    |
